# Supplementary material for: On-substrate polymerization – a versatile approach for preparing conjugated polymers suitable as electrochromes and for metal ion sensing
Source: Royal Society of Chemistry journal article supplement (doi:10.1039/c4ra00721b), 2014-01-01
Supplement: c4ra00721b1.pdf [file c4ra00721b1.pdf]

***On-substrate* polymerization – a versatile approach for preparing conjugated polymers  
suitable as electrochromes and metal ion sensing**

Monika Wałęsa-Chorab<sup>1</sup> and W.G. Skene<sup>1\*</sup>

<sup>1</sup>Laboratoire de caractérisation photophysique des matériaux conjugués  
Département de chimie  
Université de Montréal  
CP 6128, Centre-ville  
Montreal, QC

Corresponding author: [w.skene@umontreal.ca](mailto:w.skene@umontreal.ca)

## Tables of Contents

|                                                                                                                                                                                                                                                                                            |    |
|--------------------------------------------------------------------------------------------------------------------------------------------------------------------------------------------------------------------------------------------------------------------------------------------|----|
| <b>Figure S1.</b> Spectroelectrochemistry of <b>P1</b> with applied voltages of 2000 (—), 1900 (—), 1800 (—), 1700 (—), 1500 (—), 1000 (—) and 100 (—) mV for 30 sec. ....                                                                                                                 | 4  |
| <b>Figure S2.</b> Percent transmission of <b>P1</b> monitored at 690 nm with switching potentials of 1500 and 100 mV for 40 and 5 sec. ....                                                                                                                                                | 5  |
| <b>Figure S3.</b> Cyclic voltammograms of <b>P1</b> (—), <b>P2</b> (—), <b>P3</b> (—), <b>P4</b> (—), <b>P5</b> (—), <b>P6</b> (—) and <b>P7</b> (—). ....                                                                                                                                 | 6  |
| <b>Figure S4.</b> Dependence of $i_{ox}$ on the thickness of the layer of <b>P1</b> . ....                                                                                                                                                                                                 | 7  |
| <b>Figure S5.</b> Dependence of $i_{rev}$ on the thickness of the layer for <b>P1</b> . ....                                                                                                                                                                                               | 8  |
| <b>Figure S6.</b> Dependence of $\Delta i$ on the thickness of the layer of <b>P1</b> . ....                                                                                                                                                                                               | 9  |
| <b>Figure S7.</b> Dependence of $i_{ox}/i_{rev}$ on the thickness of the layer of <b>P1</b> ( $R = -0.92$ ). ....                                                                                                                                                                          | 10 |
| <b>Figure S8.</b> Dependence of $\Delta E$ on the thickness of the layer of <b>P1</b> . ....                                                                                                                                                                                               | 11 |
| <b>Figure S9.</b> Profilometry trace of <b>P1</b> immobilized on glass having a thickness of 1500 nm. ....                                                                                                                                                                                 | 12 |
| <b>Figure S10.</b> Profilometry trace of <b>P1</b> immobilized on glass having a thickness of 1000 nm. ....                                                                                                                                                                                | 13 |
| <b>Figure S11.</b> Profilometry trace of <b>P1</b> immobilized on glass having a thickness of 750 nm. ....                                                                                                                                                                                 | 14 |
| <b>Figure S12.</b> Profilometry trace of <b>P1</b> immobilized on glass having a thickness of 500 nm. ....                                                                                                                                                                                 | 15 |
| <b>Figure S13.</b> Profilometry trace of <b>P1</b> immobilized on glass having a thickness of 350 nm. ....                                                                                                                                                                                 | 16 |
| <b>Figure S14.</b> Profilometry trace of <b>P1</b> immobilized on glass having a thickness of 130 nm. ....                                                                                                                                                                                 | 17 |
| <b>Figure S15.</b> Spectroelectrochemistry of <b>P2</b> with applied voltages of 0 (—), 800 (—), 1000 (—), 1100 (—), 1200 (—), 1300 (—), 1400 (—), and 1500 (—) mV for 30 sec. ....                                                                                                        | 18 |
| <b>Figure S16.</b> Spectroelectrochemistry of <b>P2</b> with applied voltages of 1500 (—), 1400 (—), 1300 (—), 1200 (—), 1100 (—), 1000 (—), 800 (—), 600 (—), 400 (—), and 0 (—) mV for 30 sec. ....                                                                                      | 19 |
| <b>Figure S17.</b> Transmission percent with switching potentials of 1300 and 100 mV for 20, 15, 10, 5 and 1 sec monitored at 720 nm for <b>P2</b> . ....                                                                                                                                  | 20 |
| <b>Figure S18.</b> The UV-Vis spectra of polymer <b>P2</b> in its original (—), oxidized (—) and neutral (—) states. ...                                                                                                                                                                   | 21 |
| <b>Figure S19.</b> Dependence of cyclic voltammograms on the thickness of the layer of <b>P2</b> immobilized on ITO glass slides: 2000 (—), 1500 (—), 900 (—), 500 (—), 400 (—), 280 (—) and 130 (—) nm measured in anhydrous deaerated acetonitrille with 0.1 M TBAPF <sub>6</sub> . .... | 22 |
| <b>Figure S20.</b> Dependence of $i_{ox}$ on the thickness of the layer for <b>P2</b> ( $R = 0.96$ ). ....                                                                                                                                                                                 | 23 |
| <b>Figure S21.</b> Dependence of $i_{rev}$ on the thickness of the layer for <b>P2</b> ( $R = -0.96$ ). ....                                                                                                                                                                               | 24 |
| <b>Figure S22.</b> Dependence of $\Delta i$ on the thickness of the layer of <b>P2</b> ( $R = 0.96$ ). ....                                                                                                                                                                                | 25 |
| <b>Figure S23.</b> Dependence of $i_{ox}/i_{rev}$ on the thickness of the layer of <b>P2</b> . ....                                                                                                                                                                                        | 26 |
| <b>Figure S24.</b> Dependence of $\Delta E$ on the thickness of the layer of <b>P2</b> ( $R = 0.98$ ). ....                                                                                                                                                                                | 27 |

|                                                                                                                                                                                                                                                                                                                                                                                                                                                                                                                                                                                                                                                                                                                                                               |    |
|---------------------------------------------------------------------------------------------------------------------------------------------------------------------------------------------------------------------------------------------------------------------------------------------------------------------------------------------------------------------------------------------------------------------------------------------------------------------------------------------------------------------------------------------------------------------------------------------------------------------------------------------------------------------------------------------------------------------------------------------------------------|----|
| <b>Figure S25.</b> Spectroelectrochemistry of <b>P3</b> with applied voltages of 0 (—), 900 (—), 1000 (—), 1100 (—), 1200 (—), 1300 (—), 1400 (—), 1500 (—), 1600 (—), 1700 (—) and 1800 (—) mV for 30 sec. ....                                                                                                                                                                                                                                                                                                                                                                                                                                                                                                                                              | 28 |
| <b>Figure S26.</b> Spectroelectrochemistry of <b>P3</b> with applied voltages of 1800 (—), 1600 (—), 1400 (—), 1200 (—), 1000 (—), 800 (—), 600 (—), and 0 (—) mV for 30 sec. ....                                                                                                                                                                                                                                                                                                                                                                                                                                                                                                                                                                            | 29 |
| <b>Figure S27.</b> Percent transmission of <b>P3</b> monitored at 700 nm with switching potentials of 1500 and 100 mV for 20, 15, 10, 5 and 1 sec. ....                                                                                                                                                                                                                                                                                                                                                                                                                                                                                                                                                                                                       | 30 |
| <b>Figure S28.</b> Absorbance spectra of <b>P3</b> in its original (—), oxidized (—) and neutral (—) states. ....                                                                                                                                                                                                                                                                                                                                                                                                                                                                                                                                                                                                                                             | 31 |
| <b>Figure S29.</b> Dependence of cyclic voltammograms on the thickness of the layer of <b>P3</b> immobilized on ITO glass slides: 2500 (—), 1000 (—), 720 (—), 400 (—), 300 (—), 200 (—) and 120 (—) nm measured in anhydrous degassed acetonitrile with 0.1 M TBAPF <sub>6</sub> . ....                                                                                                                                                                                                                                                                                                                                                                                                                                                                      | 32 |
| <b>Figure S30.</b> Dependence of $i_{ox}$ on the thickness of the layer for <b>P3</b> . ....                                                                                                                                                                                                                                                                                                                                                                                                                                                                                                                                                                                                                                                                  | 33 |
| <b>Figure S31.</b> Dependence of $i_{rev}$ on the thickness of the layer for <b>P3</b> ....                                                                                                                                                                                                                                                                                                                                                                                                                                                                                                                                                                                                                                                                   | 34 |
| <b>Figure S32.</b> Dependence of $\Delta i$ on the thickness of the layer of <b>P3</b> . ....                                                                                                                                                                                                                                                                                                                                                                                                                                                                                                                                                                                                                                                                 | 35 |
| <b>Figure S33.</b> Dependence of $i_{ox}/i_{rev}$ on the thickness of the layer of <b>P3</b> . ....                                                                                                                                                                                                                                                                                                                                                                                                                                                                                                                                                                                                                                                           | 36 |
| <b>Figure S34.</b> Dependence of $\Delta E$ on the thickness of the layer of <b>P3</b> . ....                                                                                                                                                                                                                                                                                                                                                                                                                                                                                                                                                                                                                                                                 | 37 |
| <b>Figure S35.</b> Complexation of <b>P1</b> (top), <b>P2</b> (middle) and <b>P3</b> (bottom) with various transition metal ions before (left) and after heating at 65°C for 2h (right). ....                                                                                                                                                                                                                                                                                                                                                                                                                                                                                                                                                                 | 38 |
| <b>Figure S36.</b> Corresponding legend of metal ion complexes drop-casted onto polymers from Figure 29. ....                                                                                                                                                                                                                                                                                                                                                                                                                                                                                                                                                                                                                                                 | 38 |
| <b>Figure S37.</b> Absorbance spectra of complexes of <b>P1</b> immobilized on ITO coated glass with drop-cast Cu(BF <sub>4</sub> ) <sub>2</sub> (—), Cu(ClO <sub>4</sub> ) <sub>2</sub> (—), Cu(OAc) <sub>2</sub> (—), ZnCl <sub>2</sub> (—), Zn(OTf) <sub>2</sub> (—), Zn(ClO <sub>4</sub> ) <sub>2</sub> (—), RuCl <sub>3</sub> (—), Fe(BF <sub>4</sub> ) <sub>2</sub> (—), Fe(OTf) <sub>2</sub> (—), FeBr <sub>3</sub> (—), Fe(ClO <sub>4</sub> ) <sub>3</sub> (—), Co(ClO <sub>4</sub> ) <sub>2</sub> (—), CoCl <sub>2</sub> (—), AgBF <sub>4</sub> (—), AgPF <sub>6</sub> (—), EuCl <sub>3</sub> (—), Ni(NO <sub>3</sub> ) <sub>2</sub> (—), CuI (—), Pb(OAc) <sub>2</sub> (—) and Hg(OAc) <sub>2</sub> (—) measured after heating at 65°C for 2h. .... | 39 |
| <b>Table S1.</b> Absorbance maximum of <b>P3</b> immobilized on ITO coated glass with various metal salts. ....                                                                                                                                                                                                                                                                                                                                                                                                                                                                                                                                                                                                                                               | 39 |
| <b>Table S2.</b> Dependence of anodic cyclic voltammograms on the thickness of the layer of <b>P1</b> . ....                                                                                                                                                                                                                                                                                                                                                                                                                                                                                                                                                                                                                                                  | 40 |
| <b>Table S3.</b> Dependence of cyclic voltammograms on the thickness of the layer of <b>P2</b> . ....                                                                                                                                                                                                                                                                                                                                                                                                                                                                                                                                                                                                                                                         | 40 |
| <b>Table S4.</b> Dependence of cyclic voltammograms on the thickness of the layer of <b>P3</b> . ....                                                                                                                                                                                                                                                                                                                                                                                                                                                                                                                                                                                                                                                         | 40 |
| <b>Figure S38.</b> <sup>1</sup> H NMR spectrum of <b>1</b> . ....                                                                                                                                                                                                                                                                                                                                                                                                                                                                                                                                                                                                                                                                                             | 41 |
| <b>Figure S39.</b> <sup>13</sup> C NMR spectrum of <b>1</b> . ....                                                                                                                                                                                                                                                                                                                                                                                                                                                                                                                                                                                                                                                                                            | 42 |
| <b>Figure S40.</b> <sup>1</sup> H NMR spectrum of <b>2</b> . ....                                                                                                                                                                                                                                                                                                                                                                                                                                                                                                                                                                                                                                                                                             | 43 |
| <b>Figure S41.</b> <sup>13</sup> C NMR spectrum of <b>2</b> . ....                                                                                                                                                                                                                                                                                                                                                                                                                                                                                                                                                                                                                                                                                            | 44 |
| <b>Figure S42.</b> <sup>1</sup> H NMR spectrum of <b>3</b> . ....                                                                                                                                                                                                                                                                                                                                                                                                                                                                                                                                                                                                                                                                                             | 45 |
| <b>Figure S43.</b> <sup>13</sup> C NMR spectrum of <b>3</b> . ....                                                                                                                                                                                                                                                                                                                                                                                                                                                                                                                                                                                                                                                                                            | 46 |

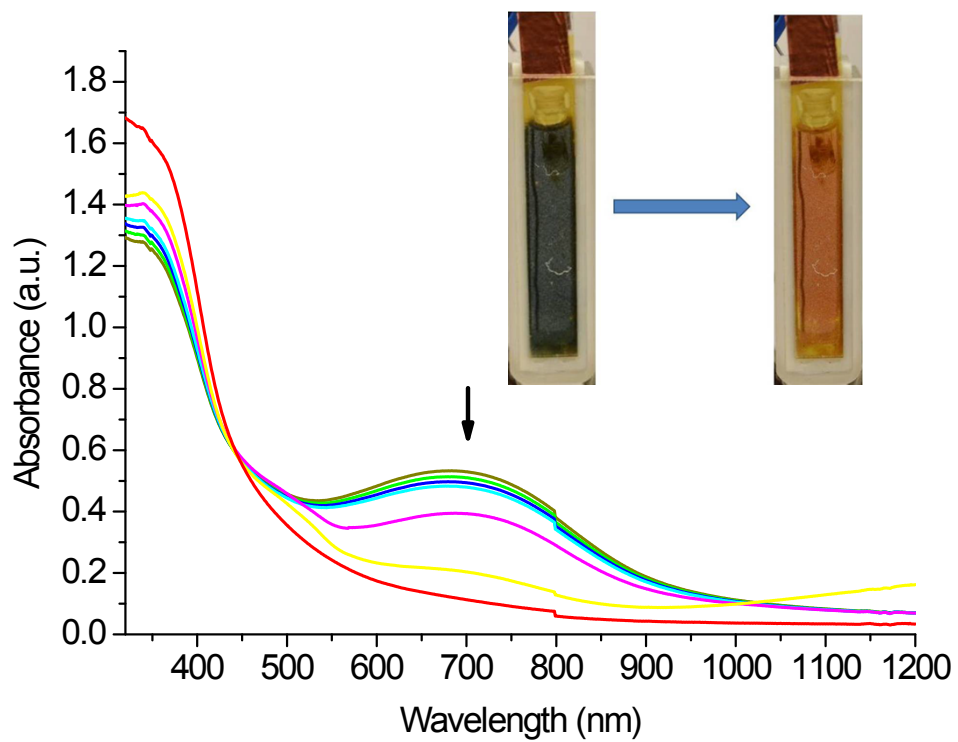

**Figure S1.** Spectroelectrochemistry of **P1** with applied voltages of 2000 (—), 1900 (—), 1800 (—), 1700 (—), 1500 (—), 1000 (—) and 100 (—) mV for 30 sec.

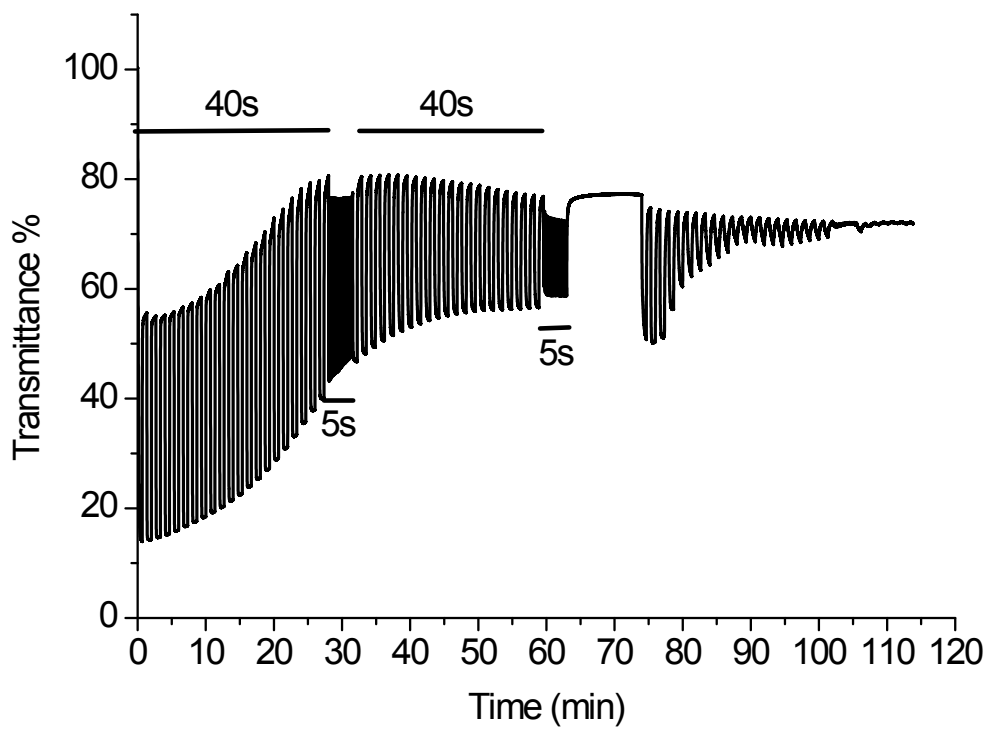

**Figure S2.** Percent transmission of **P1** monitored at 690 nm with switching potentials of 1500 and 100 mV for 40 and 5 sec.

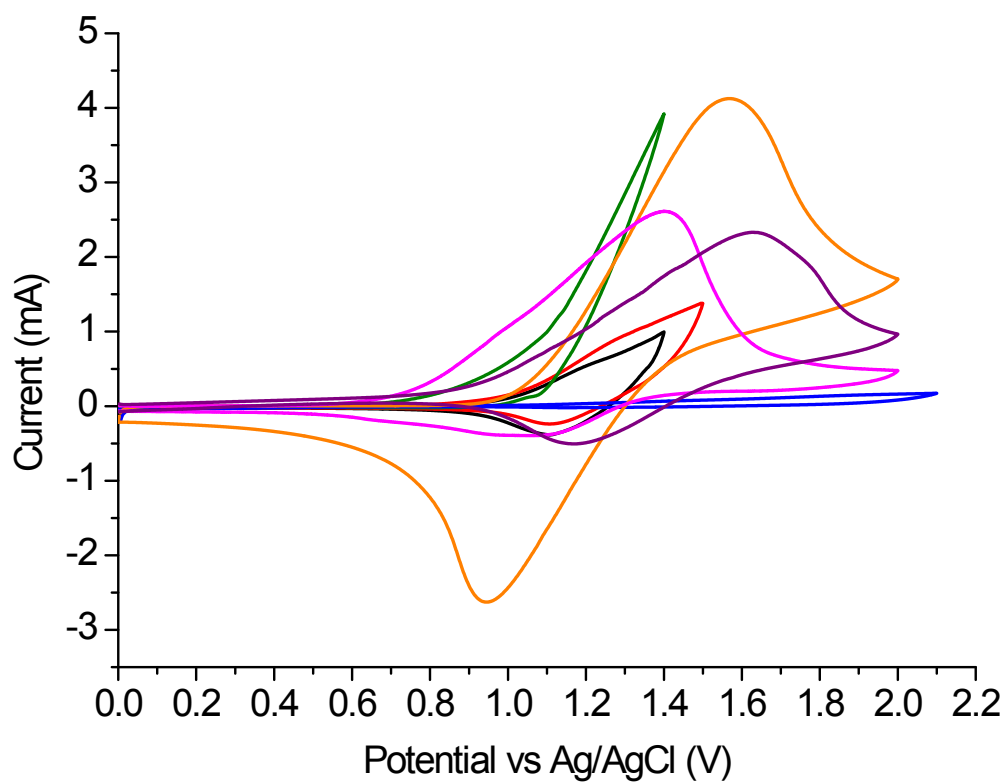

**Figure S3.** Cyclic voltammograms of P1 (—), P2 (—), P3 (—), P4 (—), P5 (—), P6 (—) and P7 (—).

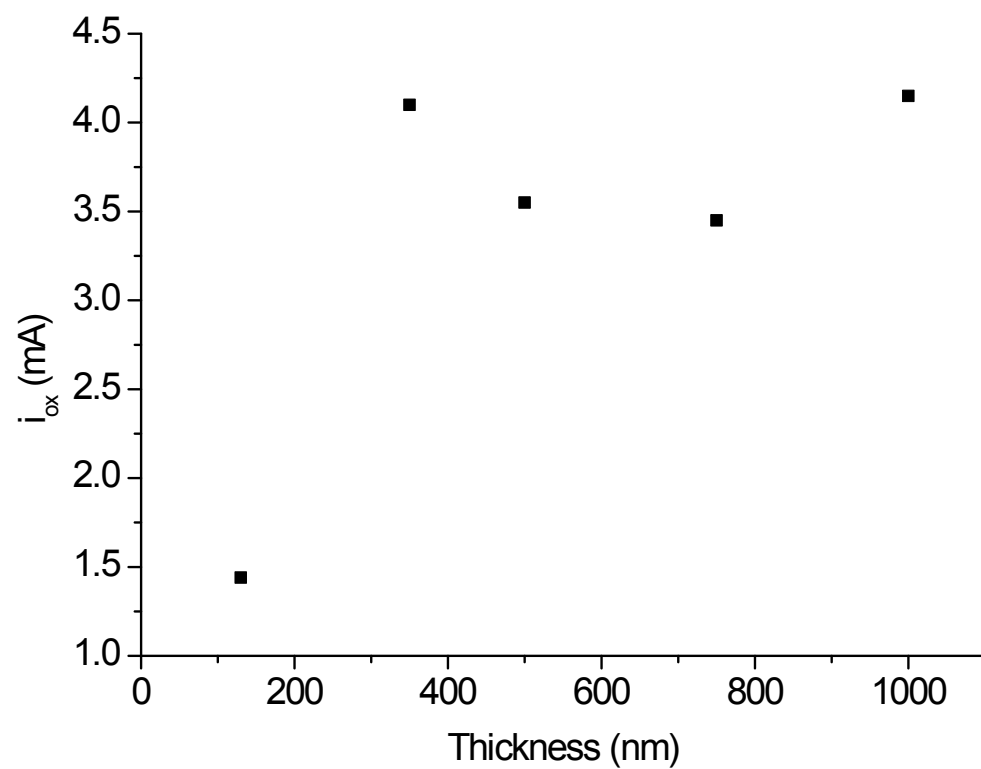

**Figure S4.** Dependence of  $i_{ox}$  on the thickness of the layer of **P1**.

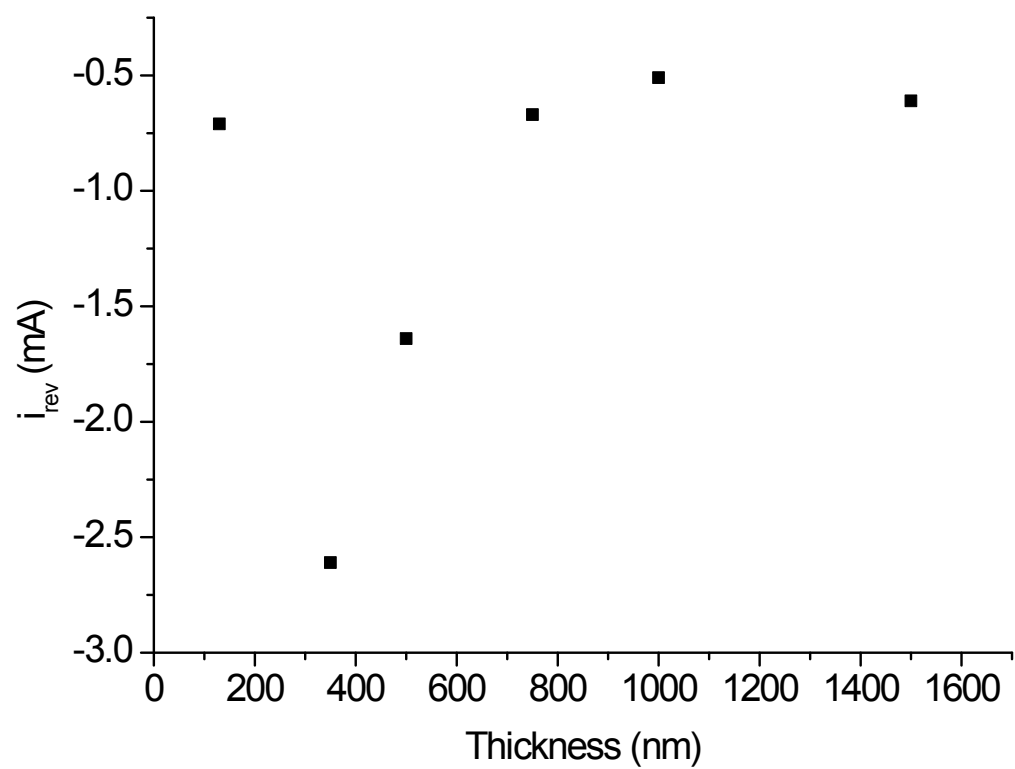

**Figure S5.** Dependence of  $i_{\text{rev}}$  on the thickness of the layer for **P1**.



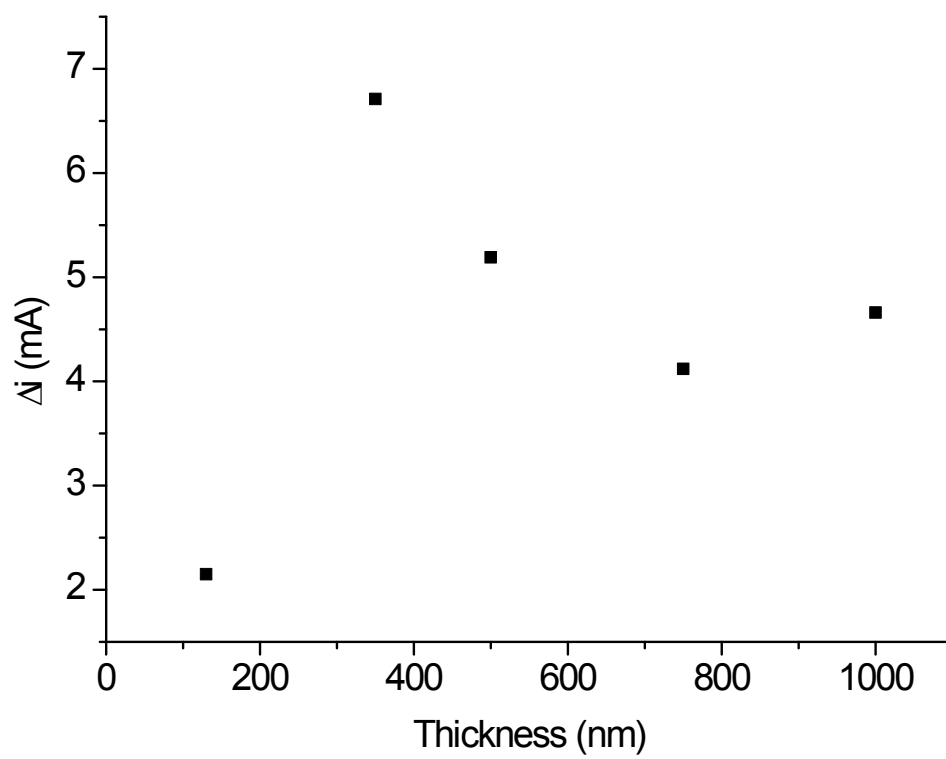

**Figure S6.** Dependence of  $\Delta i$  on the thickness of the layer of **P1**.

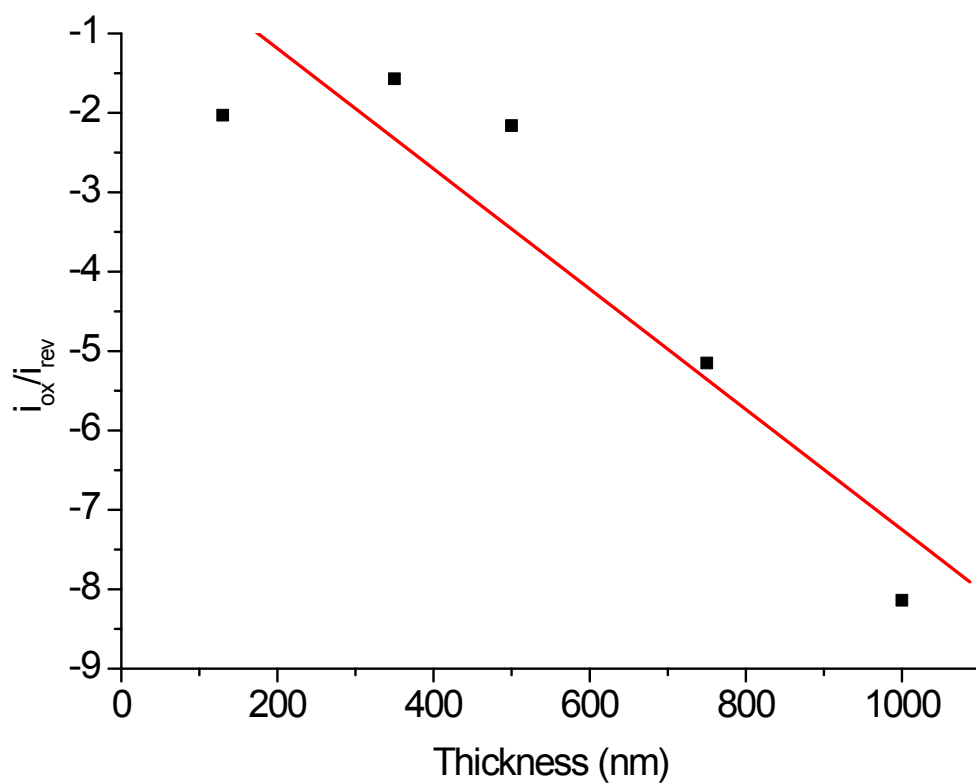

**Figure S7.** Dependence of  $i_{ox}/i_{rev}$  on the thickness of the layer of **P1** ( $R = -0.92$ ).

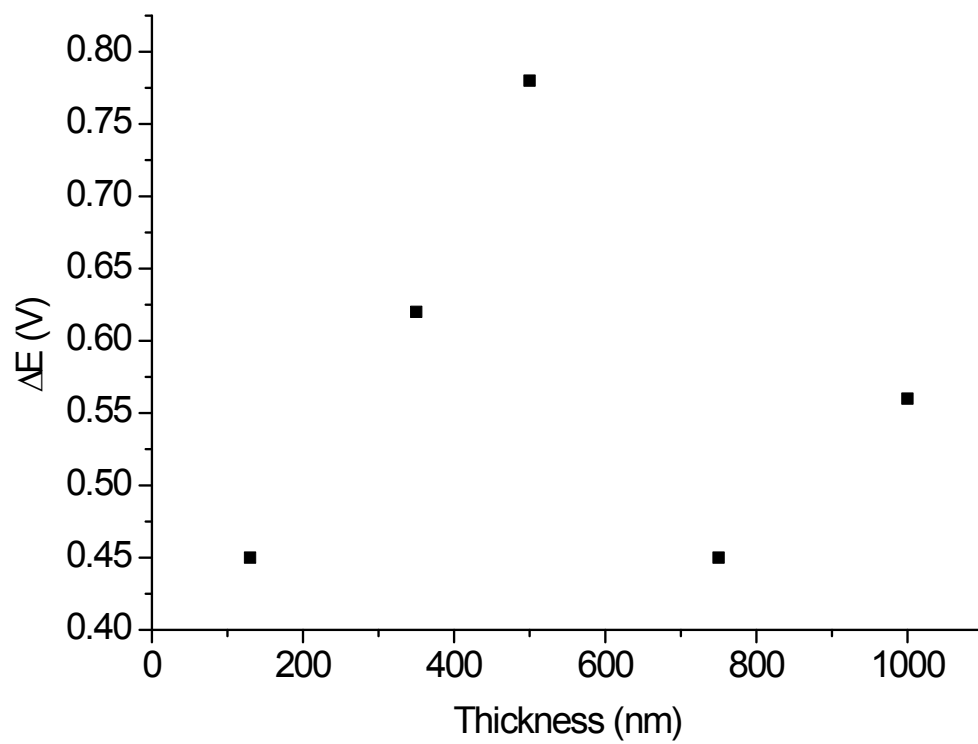

**Figure S8.** Dependence of  $\Delta E$  on the thickness of the layer of P1.

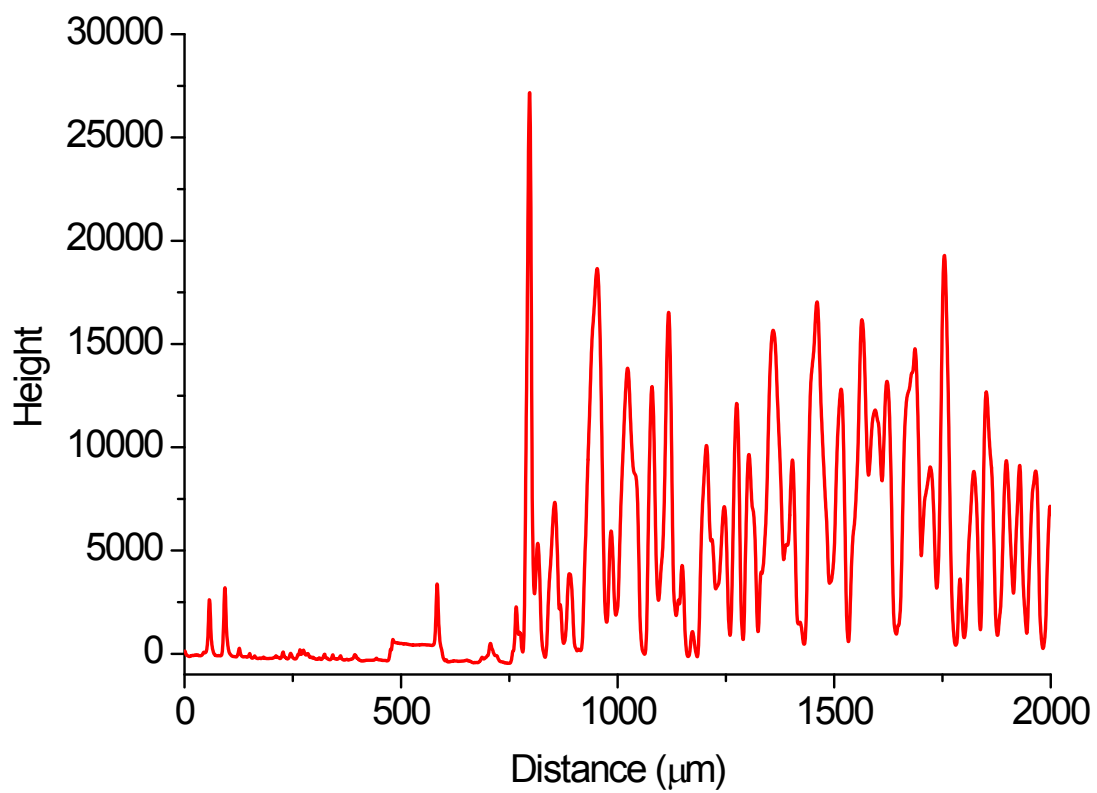

**Figure S9.** Profilometry trace of **P1** immobilized on glass having a thickness of 1500 nm.

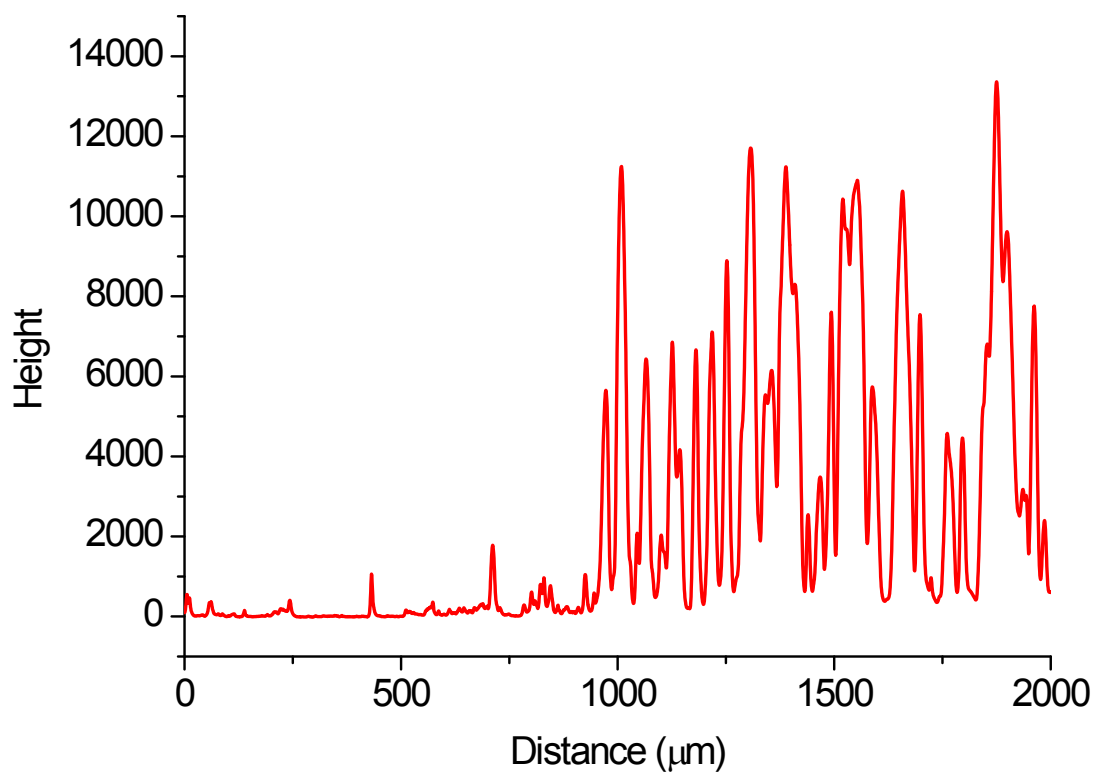

**Figure S10.** Profilometry trace of **P1** immobilized on glass having a thickness of 1000 nm.

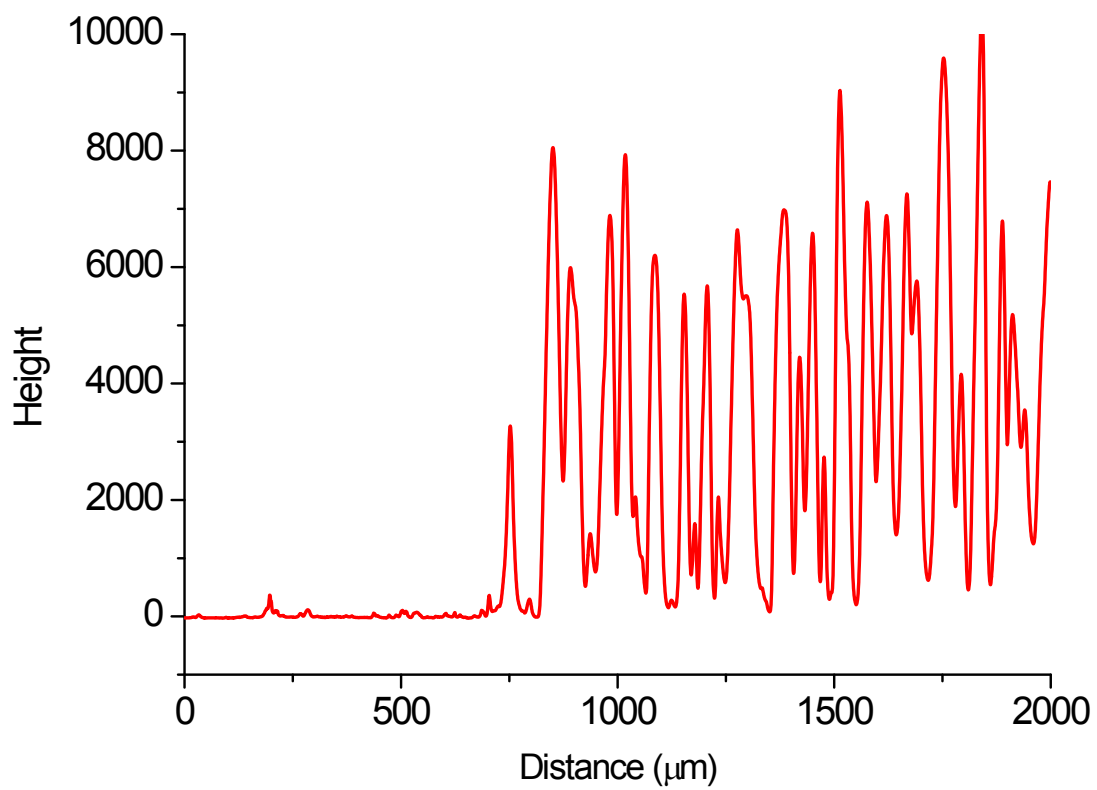

**Figure S11.** Profilometry trace of **P1** immobilized on glass having a thickness of 750 nm.

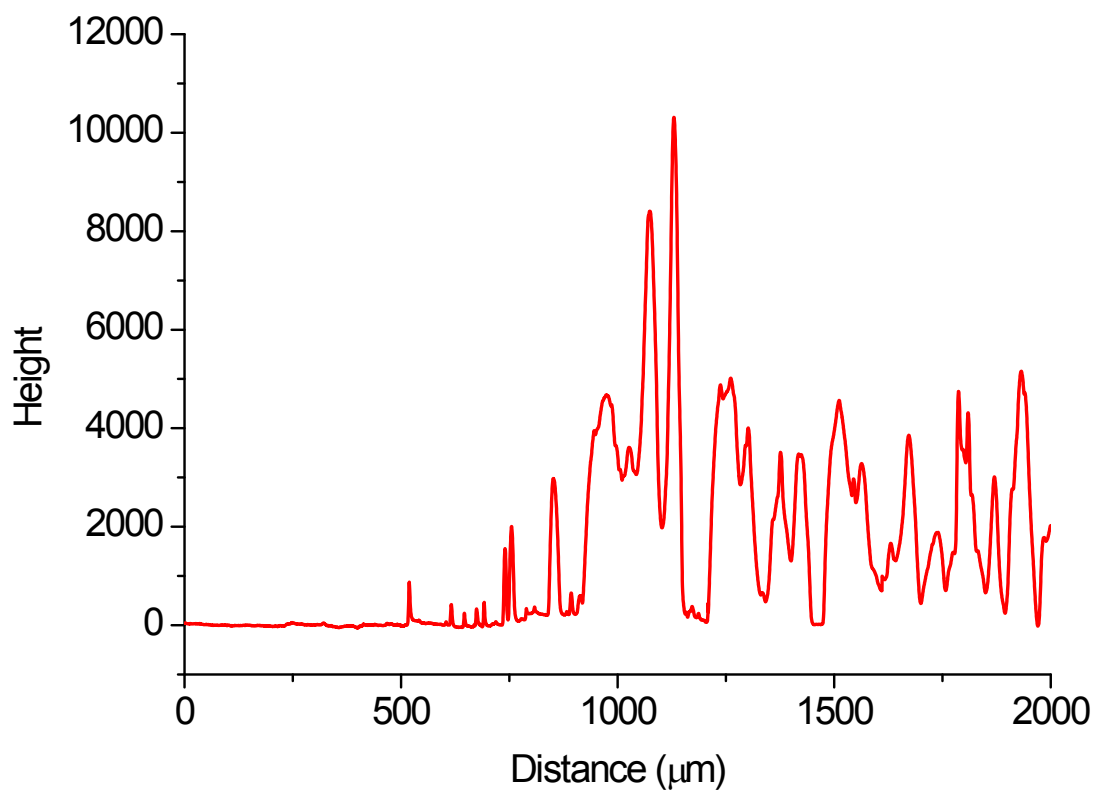

**Figure S12.** Profilometry trace of **P1** immobilized on glass having a thickness of 500 nm.

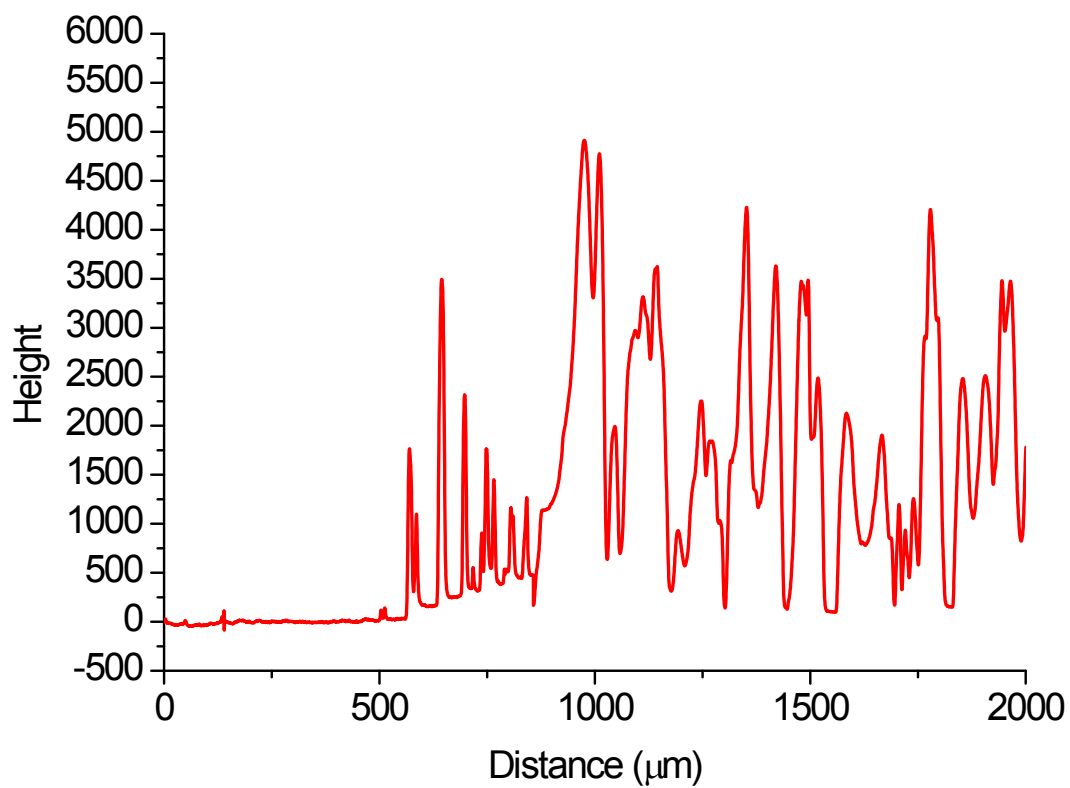

**Figure S13.** Profilometry trace of **P1** immobilized on glass having a thickness of 350 nm.



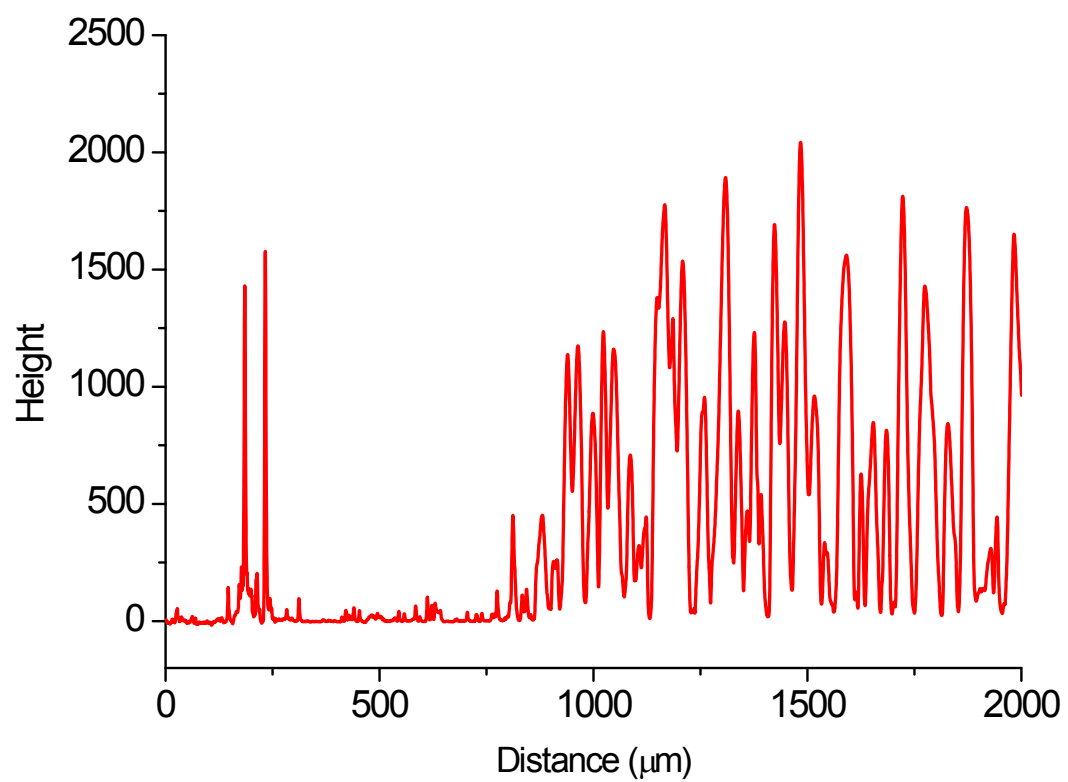

**Figure S14.** Profilometry trace of **P1** immobilized on glass having a thickness of 130 nm.

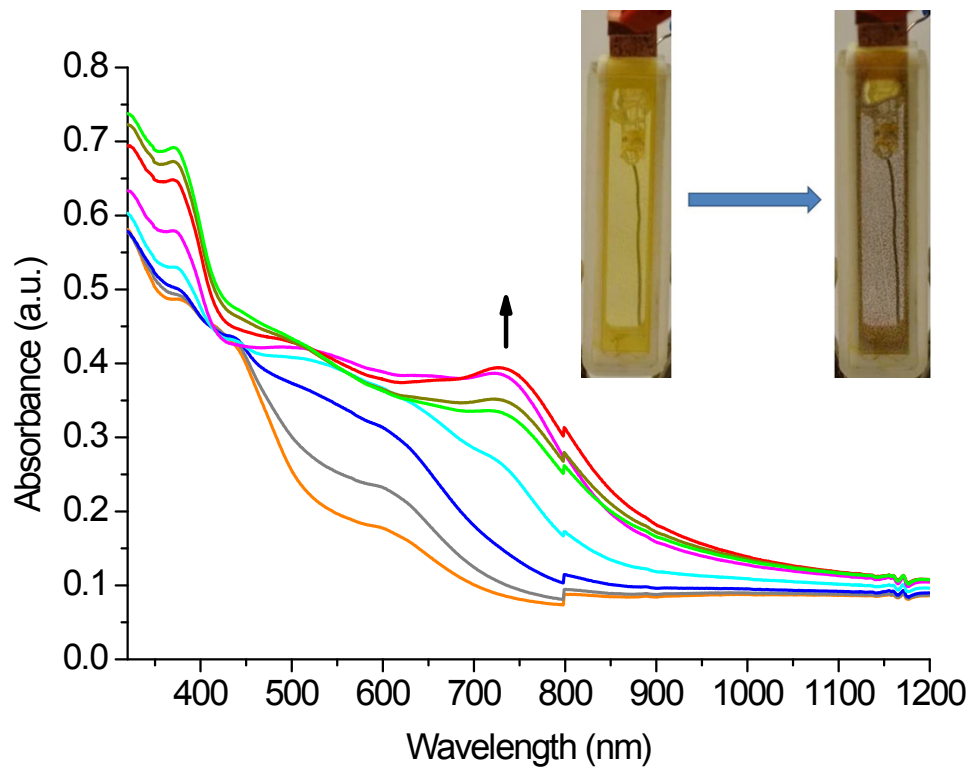

**Figure S15.** Spectroelectrochemistry of **P2** with applied voltages of 0 (—), 800 (—), 1000 (—), 1100 (—), 1200 (—), 1300 (—), 1400 (—), and 1500 (—) mV for 30 sec.

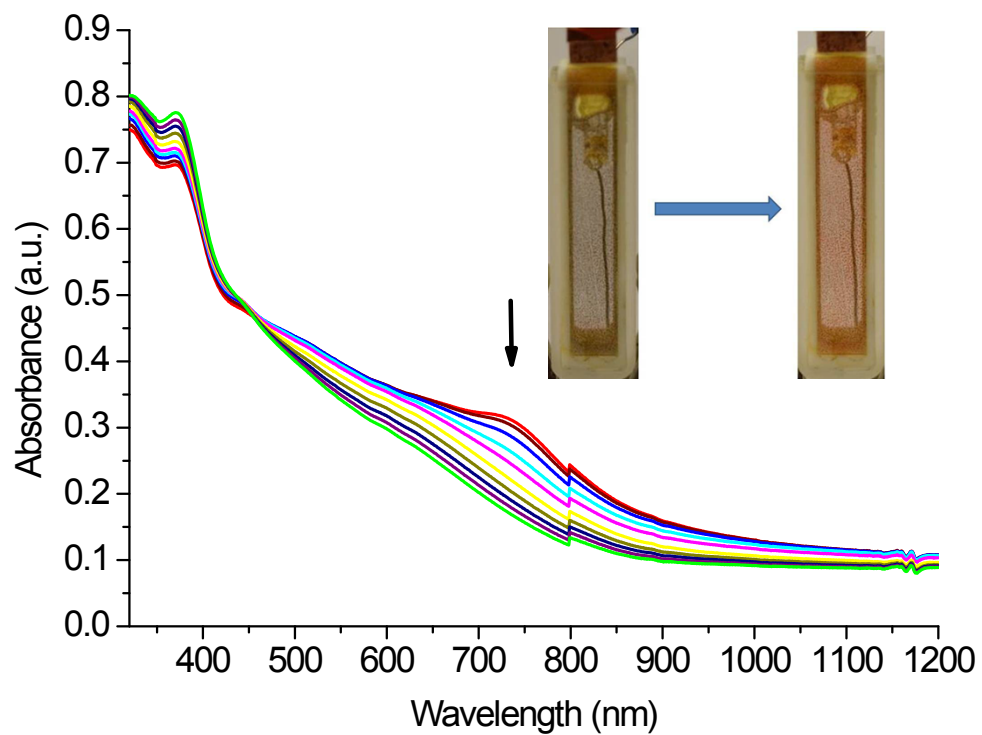

**Figure S16.** Spectroelectrochemistry of **P2** with applied voltages of 1500 (—), 1400 (—), 1300 (—), 1200 (—), 1100 (—), 1000 (—), 800 (—), 600 (—), 400 (—), and 0 (—) mV for 30 sec

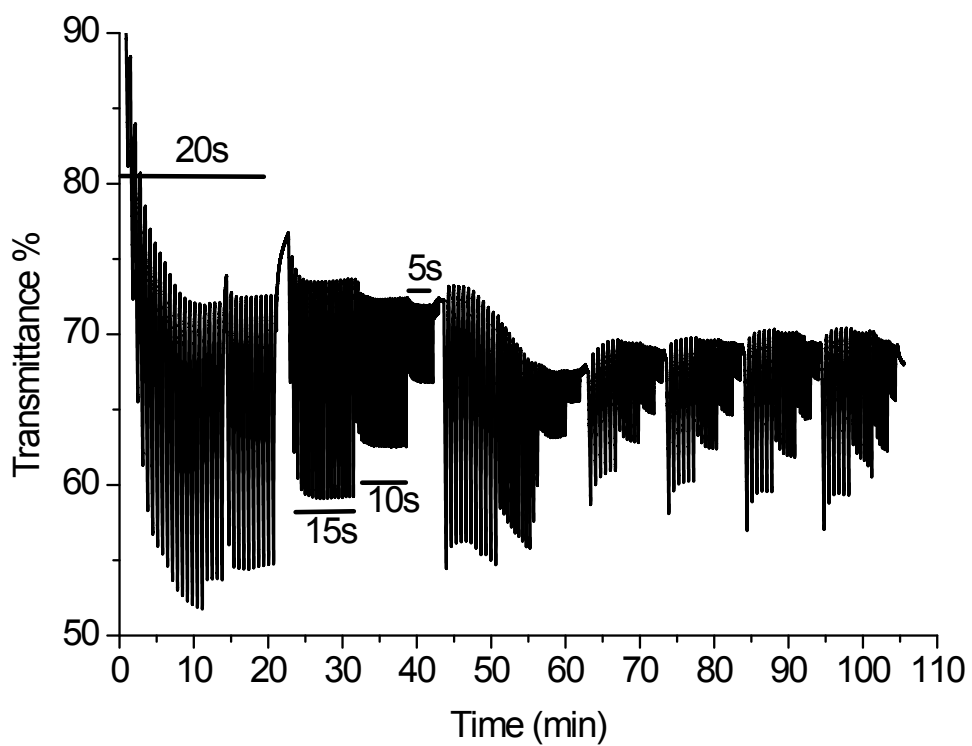

**Figure S17.** Transmission percent with switching potentials of 1300 and 100 mV for 20, 15, 10, 5 and 1 sec monitored at 720 nm for **P2**.

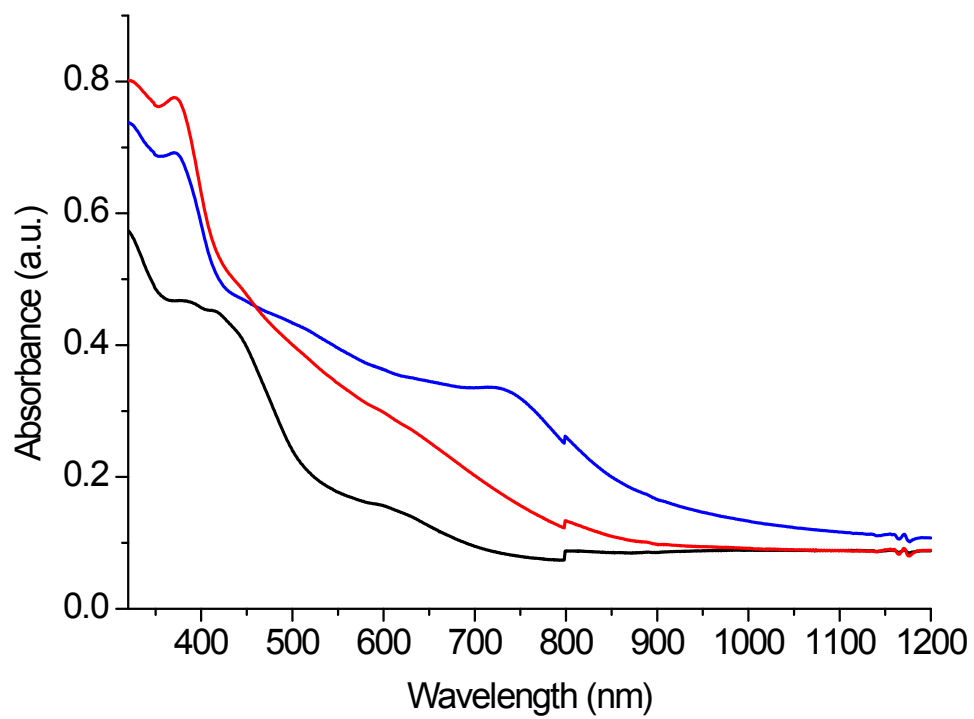

**Figure S18.** The UV-Vis spectra of polymer **P2** in its original (—), oxidized (—) and neutral (—) states.

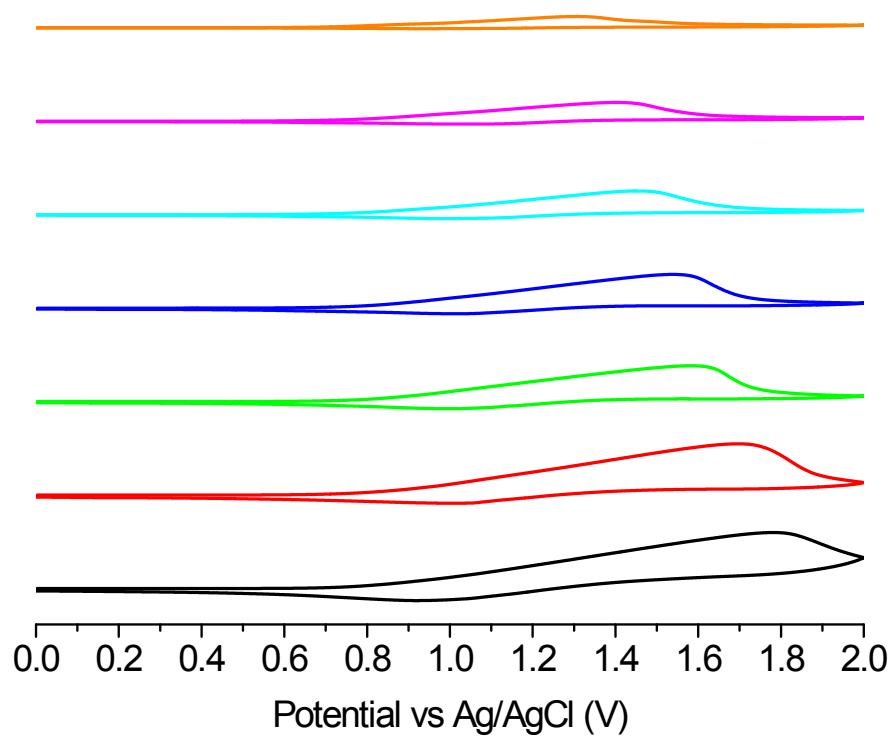

**Figure S19.** Dependence of cyclic voltammograms on the thickness of the layer of **P2** immobilized on ITO glass slides: 2000 (—), 1500 (—), 900 (—), 500 (—), 400 (—), 280 (—) and 130 (—) nm measured in anhydrous deaerated acetonitrile with 0.1 M TBAPF<sub>6</sub>.

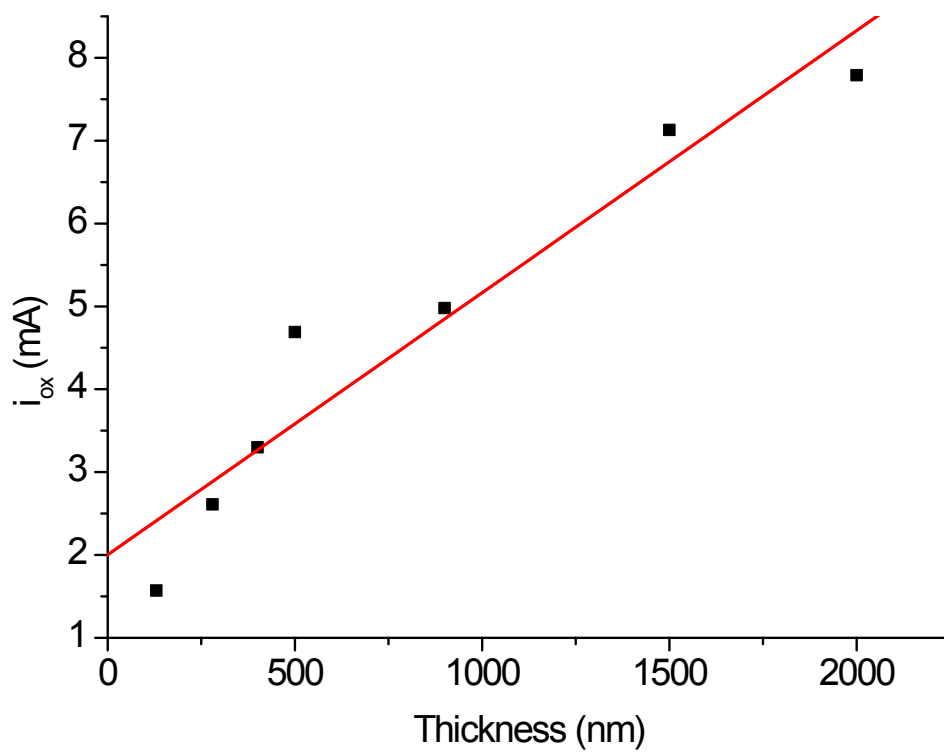

**Figure S20.** Dependence of  $i_{ox}$  on the thickness of the layer for **P2** ( $R = 0.96$ ).

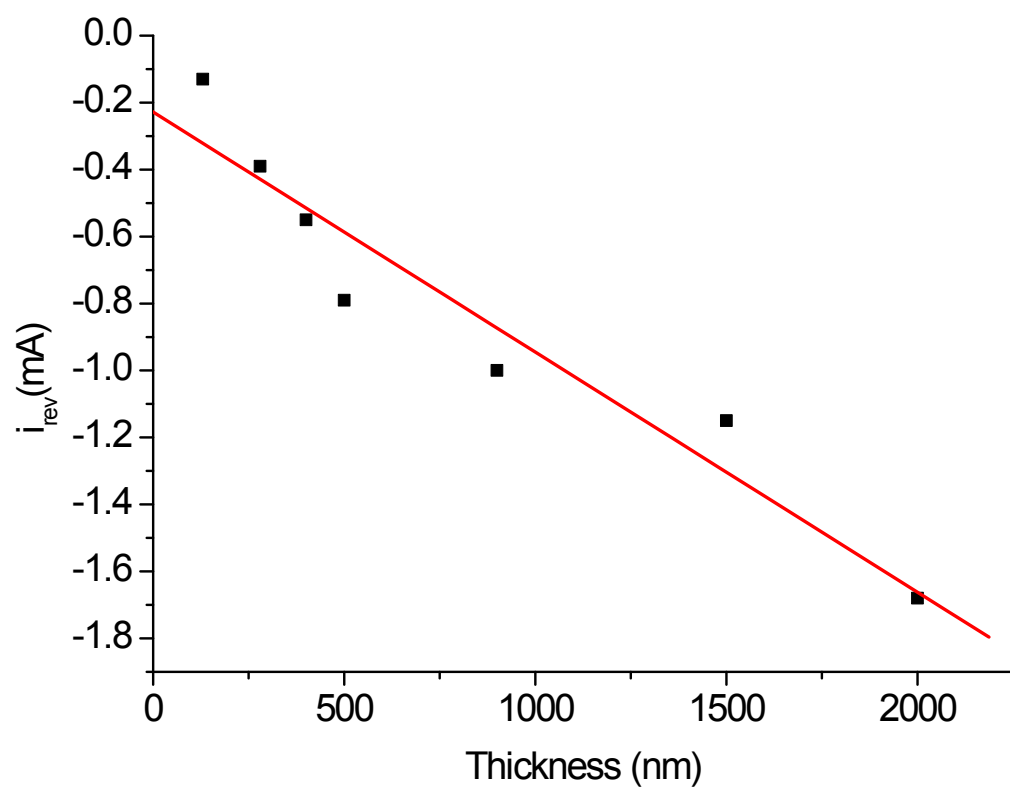

**Figure S21.** Dependence of  $i_{rev}$  on the thickness of the layer for **P2** ( $R = -0.96$ ).



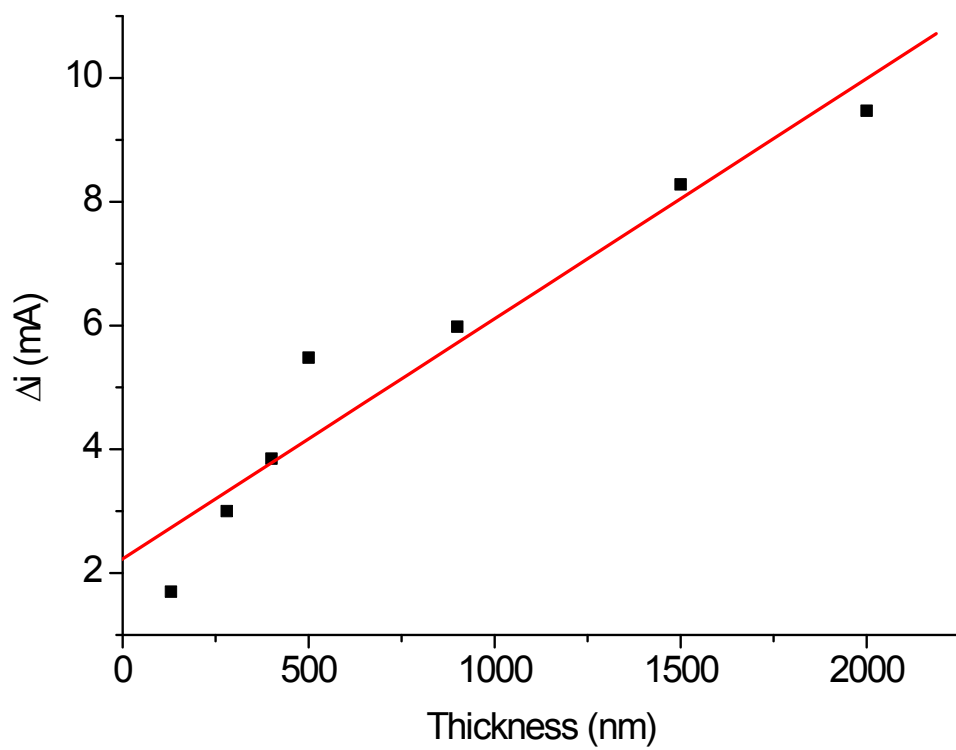

**Figure S22.** Dependence of  $\Delta i$  on the thickness of the layer of **P2** ( $R = 0.96$ ).

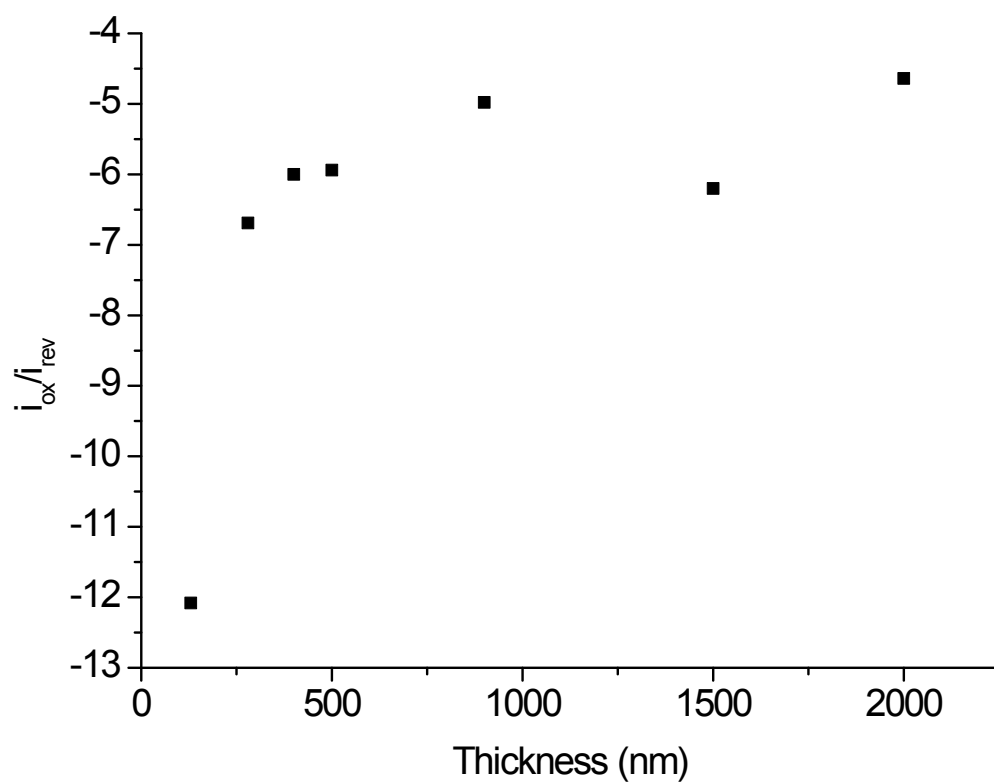

**Figure S23.** Dependence of  $i_{ox}/i_{rev}$  on the thickness of the layer of **P2**.

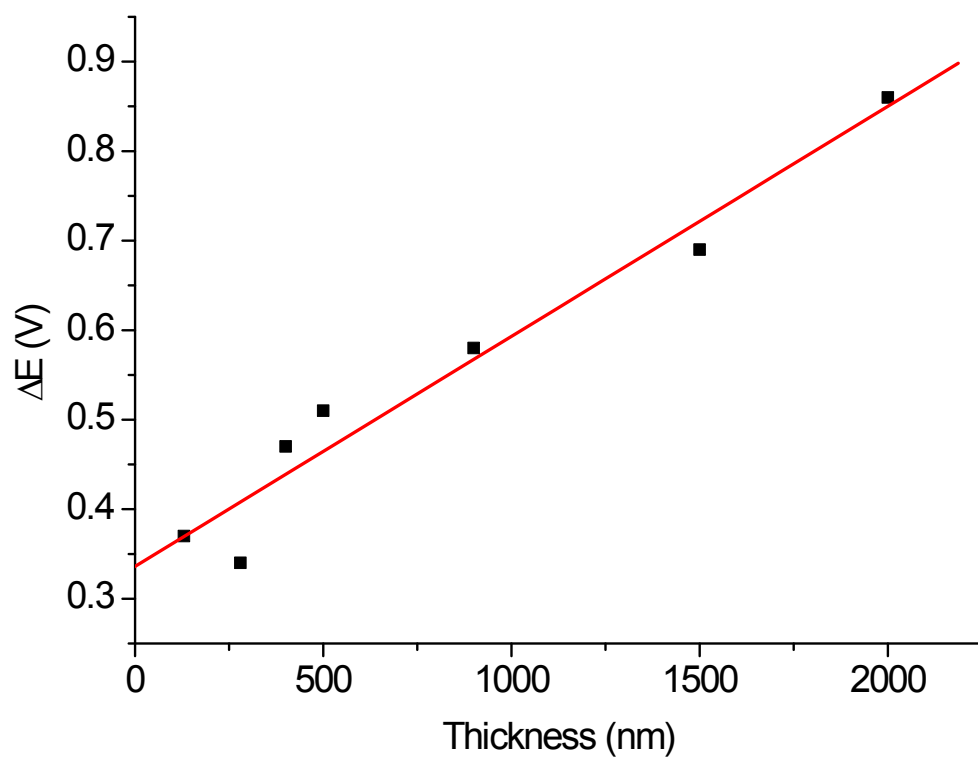

**Figure S24.** Dependence of  $\Delta E$  on the thickness of the layer of **P2** ( $R = 0.98$ ).

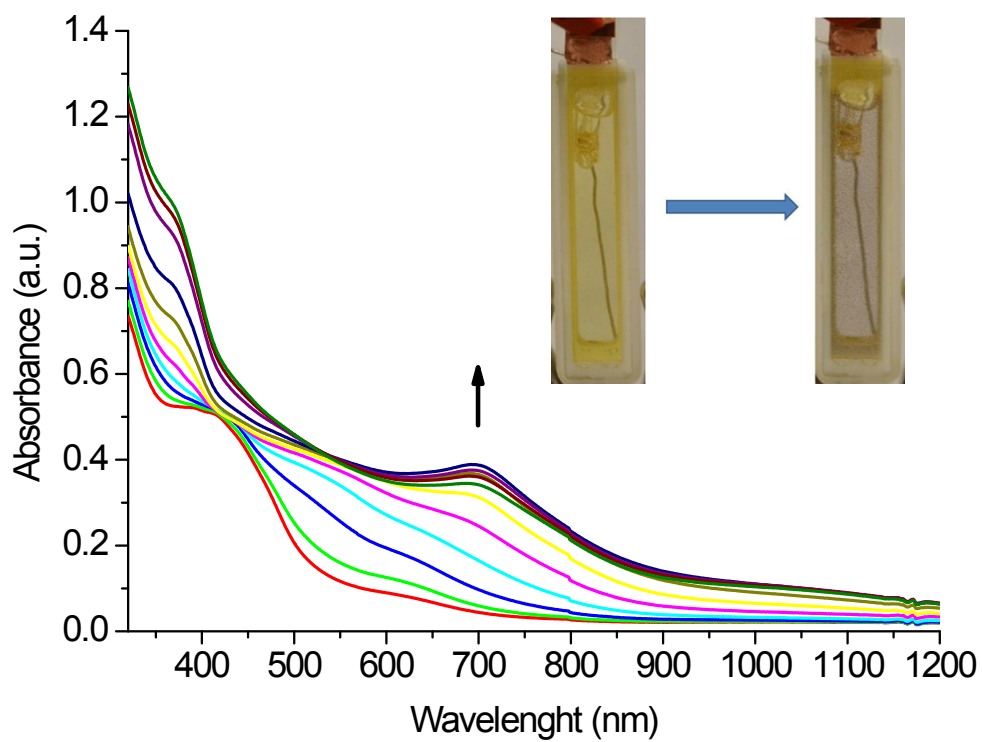

**Figure S25.** Spectroelectrochemistry of **P3** with applied voltages of 0 (—), 900 (—), 1000 (—), 1100 (—), 1200 (—), 1300 (—), 1400 (—), 1500 (—), 1600 (—), 1700 (—) and 1800 (—) mV for 30 sec.

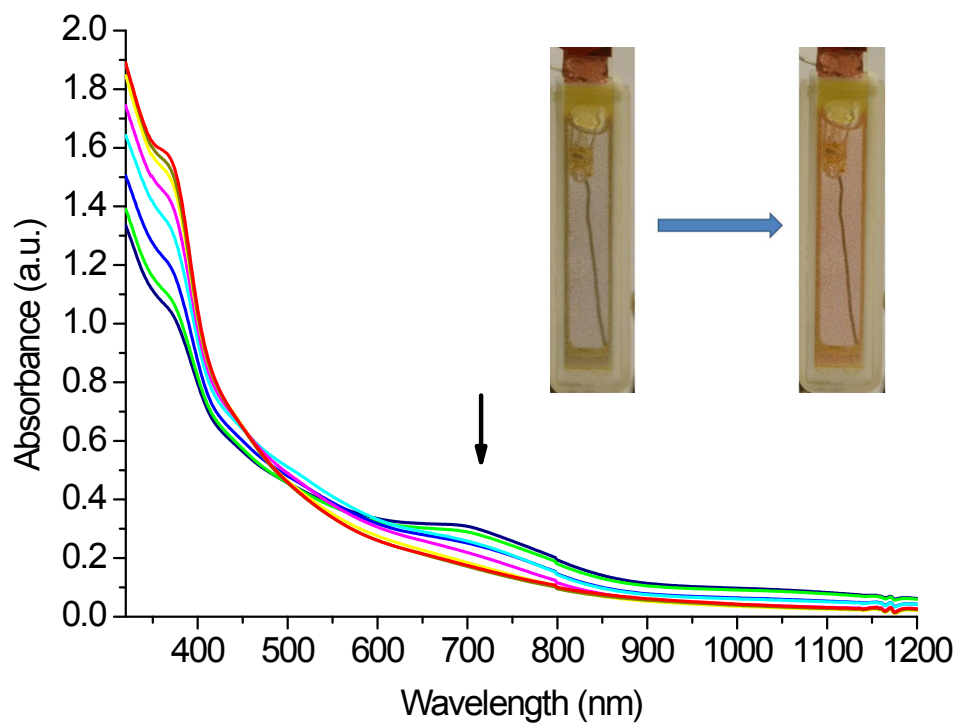

**Figure S26.** Spectroelectrochemistry of **P3** with applied voltages of 1800 (—), 1600 (—), 1400 (—), 1200 (—), 1000 (—), 800 (—), 600 (—), and 0 (—) mV for 30 sec.

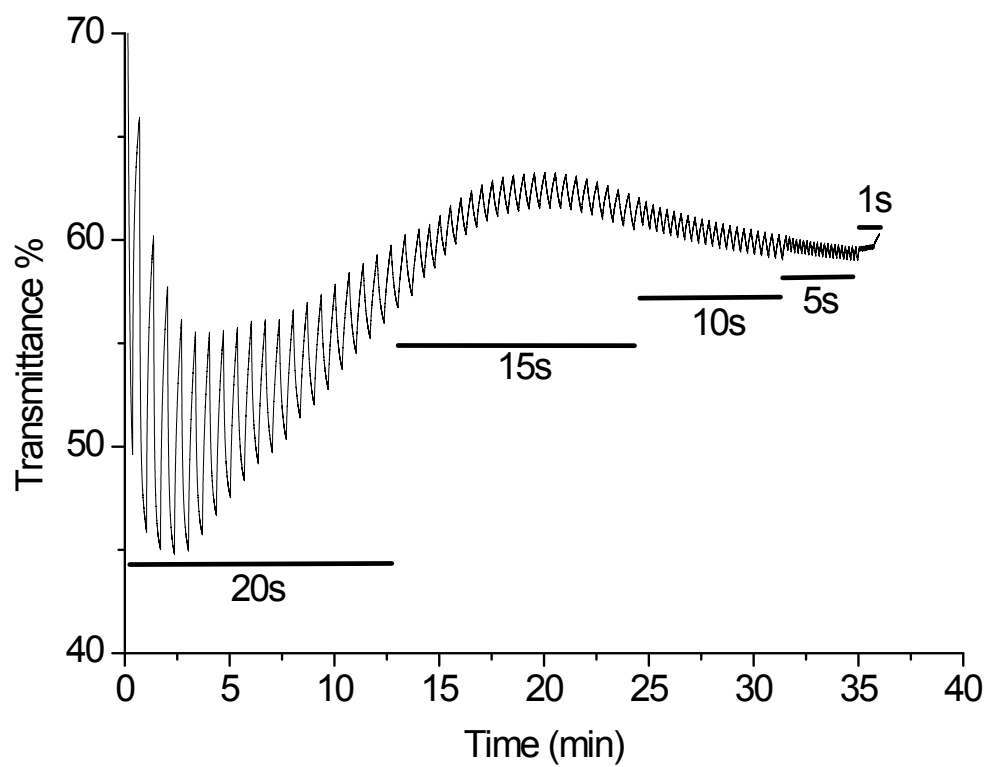

**Figure S27.** Percent transmission of **P3** monitored at 700 nm with switching potentials of 1500 and 100 mV for 20, 15, 10, 5 and 1 sec.

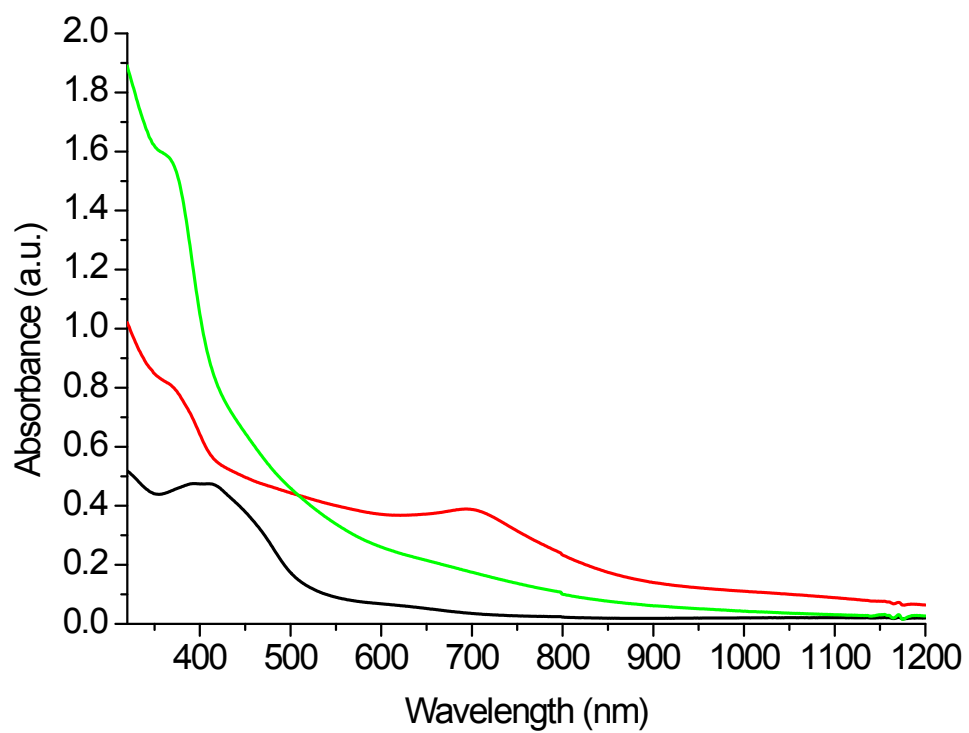

**Figure S28.** Absorbance spectra of **P3** in its original (—), oxidized (—) and neutral (—) states.

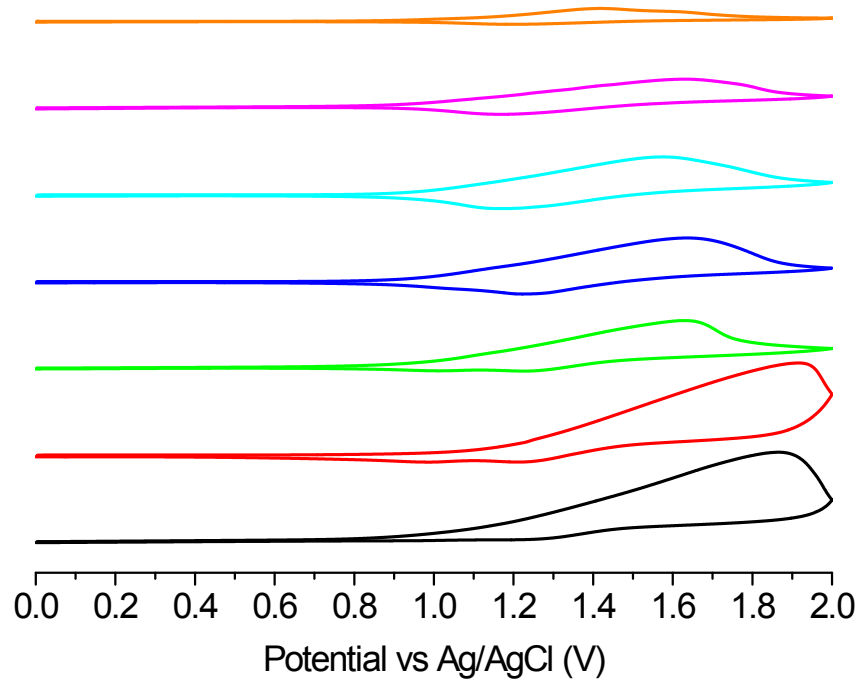

**Figure S29.** Dependence of cyclic voltammograms on the thickness of the layer of **P3** immobilized on ITO glass slides: 2500 (—), 1000 (—), 720 (—), 400 (—), 300 (—), 200 (—) and 120 (—) nm measured in anhydrous degassed acetonitrile with 0.1 M TBAPF<sub>6</sub>.



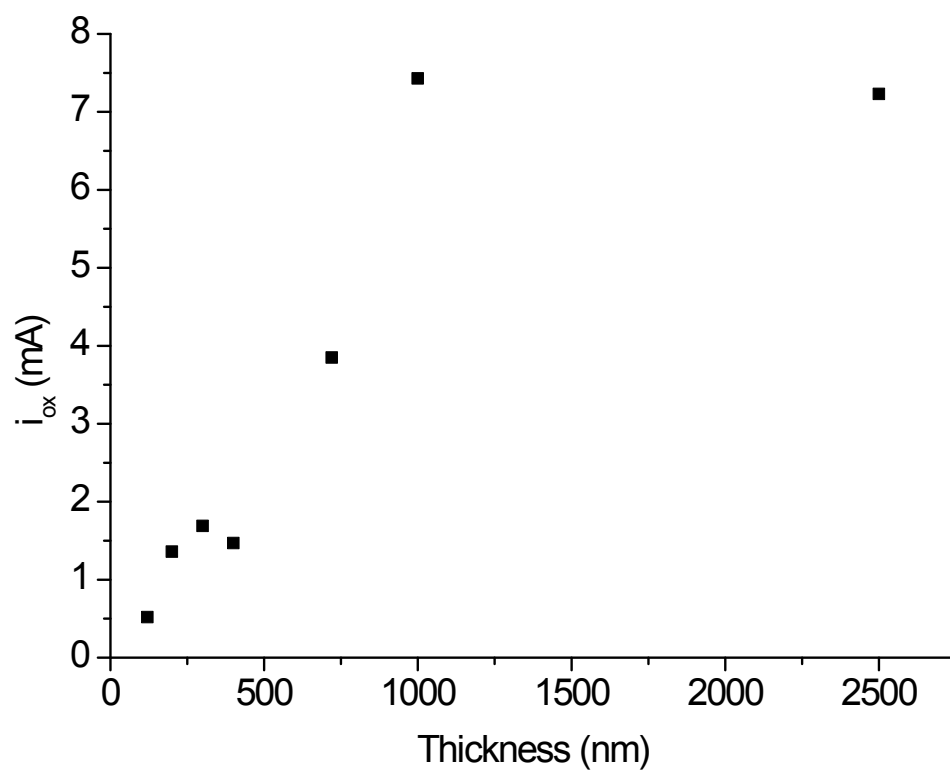

**Figure S30.** Dependence of  $i_{ox}$  on the thickness of the layer for **P3**.

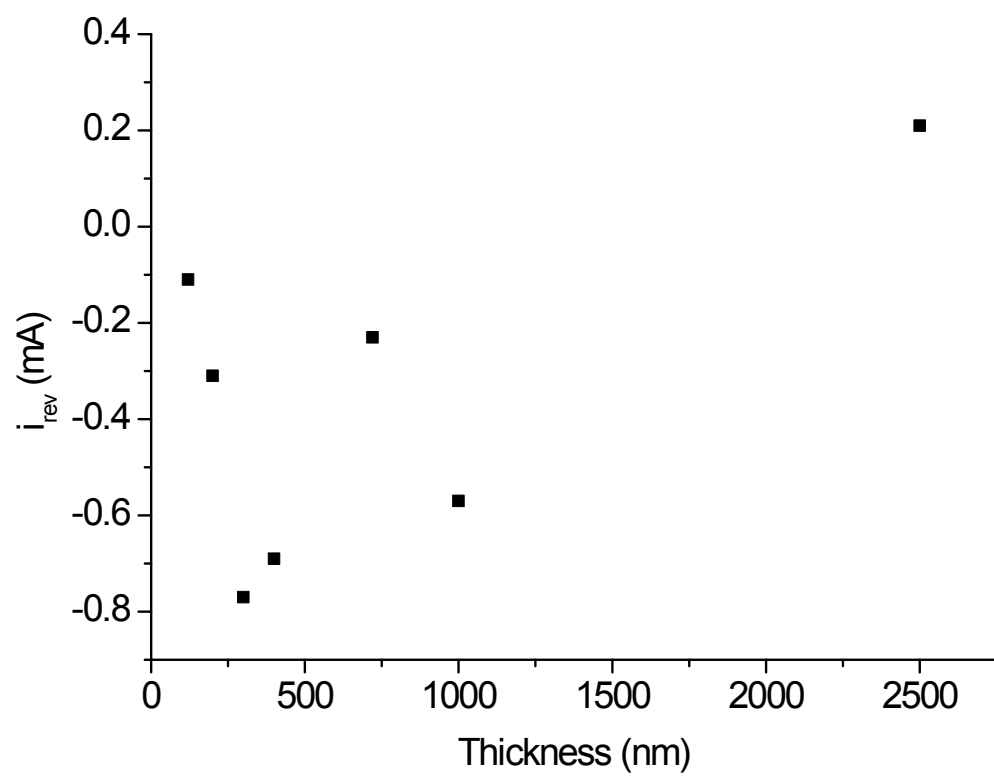

**Figure S31.** Dependence of  $i_{rev}$  on the thickness of the layer for **P3**

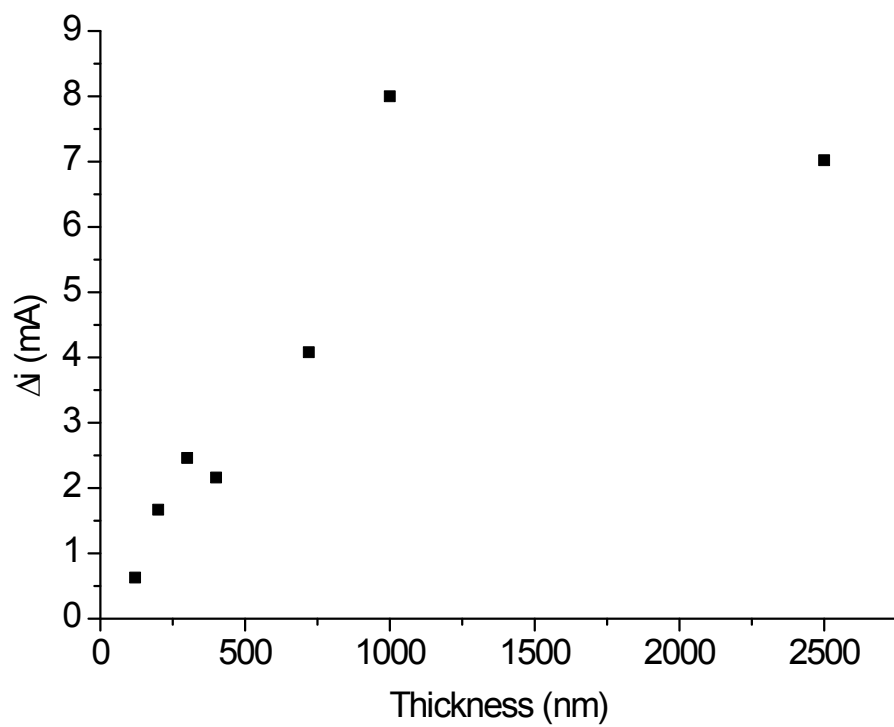

**Figure S32.** Dependence of  $\Delta i$  on the thickness of the layer of **P3**.

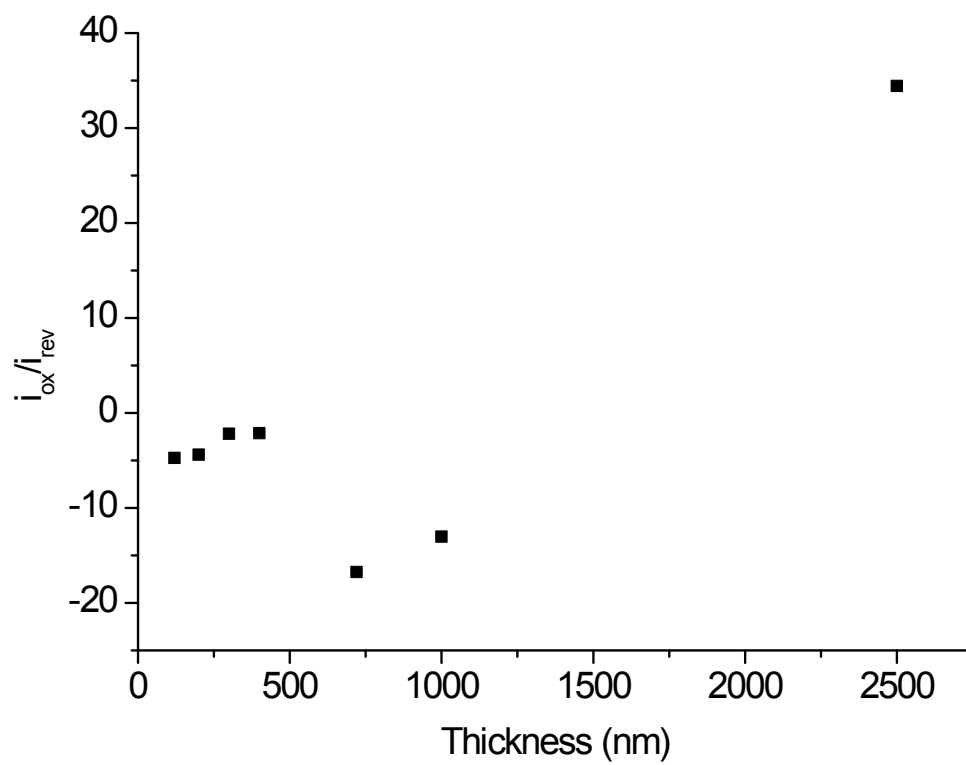

**Figure S33.** Dependence of  $i_{ox}/i_{rev}$  on the thickness of the layer of **P3**.

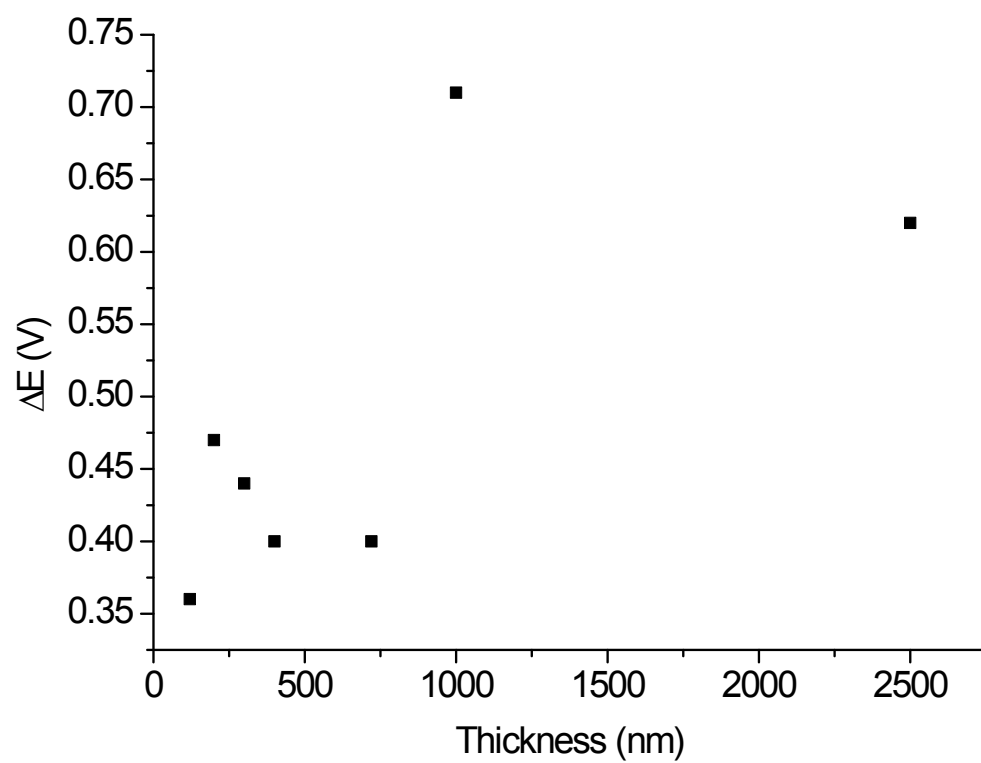

**Figure S34.** Dependence of  $\Delta E$  on the thickness of the layer of P3.

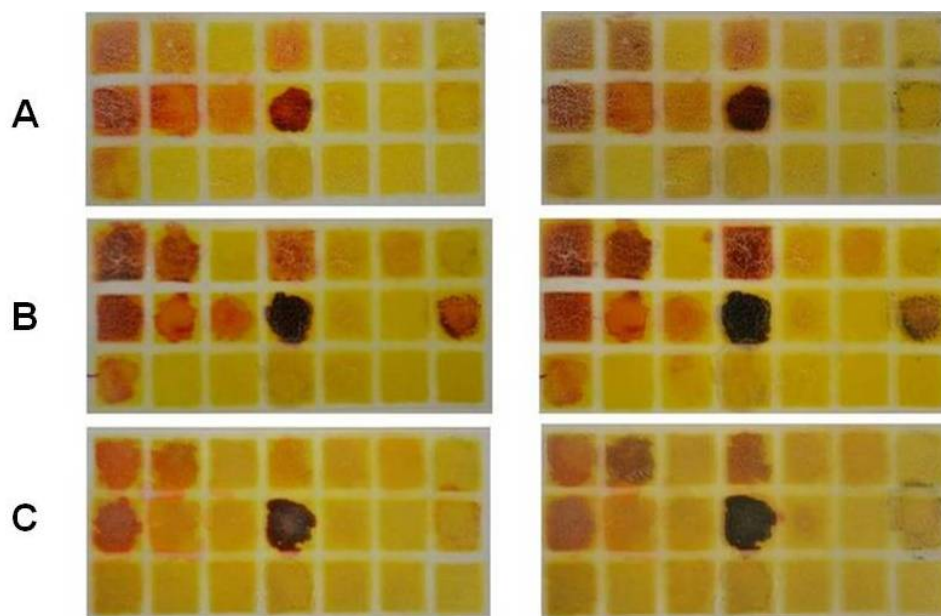

**Figure S35.** Complexation of **P1** (top), **P2** (middle) and **P3** (bottom) with various transition metal ions before (left) and after heating at 65°C for 2h (right).

|                            |                                       |                            |                             |                                       |                             |                  |
|----------------------------|---------------------------------------|----------------------------|-----------------------------|---------------------------------------|-----------------------------|------------------|
| $\text{Cu}(\text{BF}_4)_2$ | $\text{Cu}(\text{ClO}_4)_2$           | $\text{Cu}(\text{OAc})_2$  | $\text{ZnCl}_2$             | $\text{Zn}(\text{CF}_3\text{SO}_2)_2$ | $\text{Zn}(\text{ClO}_4)_2$ | $\text{RuCl}_2$  |
| $\text{Fe}(\text{BF}_4)_2$ | $\text{Fe}(\text{CF}_3\text{SO}_2)_2$ | $\text{FeBr}_3$            | $\text{Fe}(\text{ClO}_4)_3$ | $\text{Co}(\text{ClO}_4)_2$           | $\text{CoCl}_2$             | $\text{AgBF}_4$  |
| $\text{AgPF}_6$            | $\text{EuCl}_3$                       | $\text{Ni}(\text{NO}_2)_2$ | $\text{CuI}$                | $\text{Pb}(\text{OAc})_2$             | $\text{Hg}(\text{OAc})_2$   | Original polymer |

**Figure S36.** Corresponding legend of metal ion complexes drop-casted onto polymers from Figure 29.

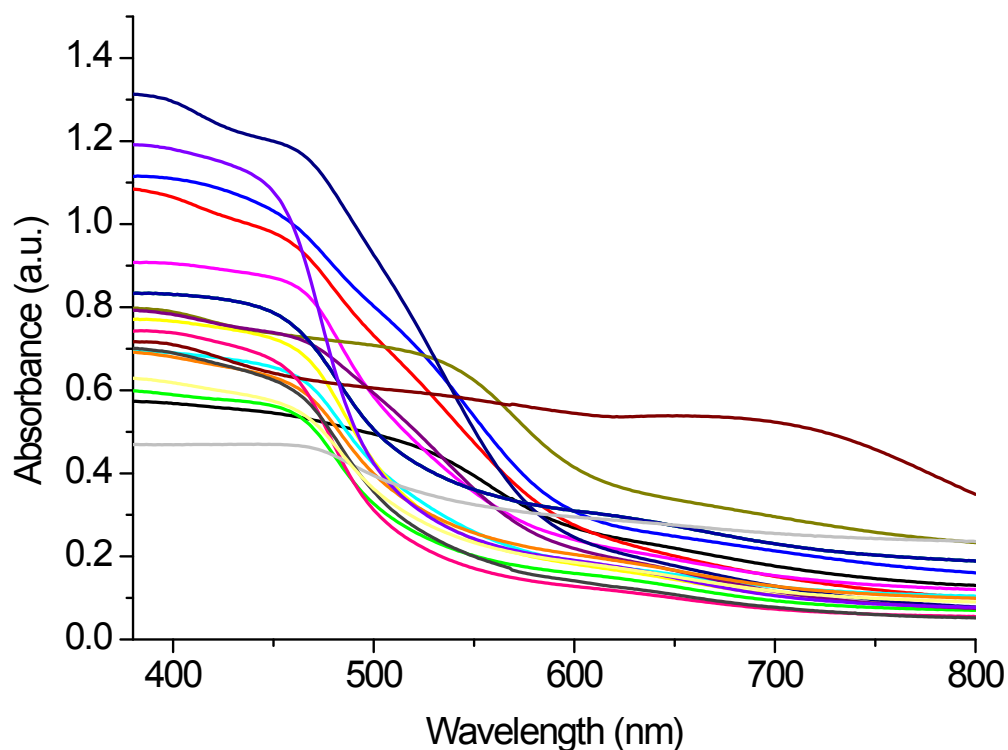

**Figure S37.** Absorbance spectra of complexes of **P1** immobilized on ITO coated glass with drop-cast  $\text{Cu}(\text{BF}_4)_2$  (—),  $\text{Cu}(\text{ClO}_4)_2$  (—),  $\text{Cu}(\text{OAc})_2$  (—),  $\text{ZnCl}_2$  (—),  $\text{Zn}(\text{OTf})_2$  (—),  $\text{Zn}(\text{ClO}_4)_2$  (—),  $\text{RuCl}_3$  (—),  $\text{Fe}(\text{BF}_4)_2$  (—),  $\text{Fe}(\text{OTf})_2$  (—),  $\text{FeBr}_3$  (—),  $\text{Fe}(\text{ClO}_4)_3$  (—),  $\text{Co}(\text{ClO}_4)_2$  (—),  $\text{CoCl}_2$  (—),  $\text{AgBF}_4$  (—),  $\text{AgPF}_6$  (—),  $\text{EuCl}_3$  (—),  $\text{Ni}(\text{NO}_3)_2$  (—),  $\text{CuI}$  (—),  $\text{Pb}(\text{OAc})_2$  (—) and  $\text{Hg}(\text{OAc})_2$  (—) measured after heating at  $65^\circ\text{C}$  for 2h.

**Table S1.** Absorbance maximum of **P3** immobilized on ITO coated glass with various metal salts.

| metal salt                  | $\lambda_{\text{abs}}$ (nm) | metal salt                  | $\lambda_{\text{abs}}$ (nm) | metal salt                 | $\lambda_{\text{abs}}$ (nm) |
|-----------------------------|-----------------------------|-----------------------------|-----------------------------|----------------------------|-----------------------------|
| $\text{Cu}(\text{BF}_4)_2$  | 504                         | $\text{Fe}(\text{BF}_4)_2$  | 535                         | $\text{AgPF}_6$            | 458                         |
| $\text{Cu}(\text{ClO}_4)_2$ | 459                         | $\text{Fe}(\text{OTf})_2$   | 466                         | $\text{EuCl}_3$            | 439                         |
| $\text{Cu}(\text{OAc})_2$   | 444                         | $\text{FeBr}_3$             | 468                         | $\text{Ni}(\text{NO}_3)_2$ | 452                         |
| $\text{ZnCl}_2$             | 451                         | $\text{Fe}(\text{ClO}_4)_3$ | 696                         | $\text{CuI}$               | 467                         |
| $\text{Zn}(\text{OTf})_2$   | 460                         | $\text{Co}(\text{ClO}_4)_2$ | 442                         | $\text{Pb}(\text{OAc})_2$  | 455                         |
| $\text{Zn}(\text{ClO}_4)_2$ | 460                         | $\text{CoCl}_2$             | 448                         | $\text{Hg}(\text{OAc})_2$  | 458                         |
| $\text{RuCl}_3$             | 459                         | $\text{AgBF}_4$             | 445                         |                            |                             |

**Table S2.** Dependence of anodic cyclic voltammograms on the thickness of the layer of **P1**.

|         | $i_{ox}$ (mA) | $i_{rev}$ (mA) | $\Delta i$ (mA) | $i_{ox}/i_{rev}$ | $E_{ox}$ (V) | $E_{rev}$ (V) | $\Delta E$ (V) |
|---------|---------------|----------------|-----------------|------------------|--------------|---------------|----------------|
| 1500 nm | -             | -0.61          | -               | -                | -            | 1.40          | -              |
| 1000 nm | 4.15          | -0.51          | 4.66            | -8.14            | 1.70         | 1.14          | 0.56           |
| 750 nm  | 3.45          | -0.67          | 4.12            | -5.15            | 1.64         | 1.19          | 0.45           |
| 500 nm  | 3.55          | -1.64          | 5.19            | -2.16            | 1.83         | 1.05          | 0.78           |
| 350 nm  | 4.10          | -2.61          | 6.71            | -1.57            | 1.57         | 0.95          | 0.62           |
| 130 nm  | 1.44          | -0.71          | 2.15            | -2.03            | 1.50         | 1.05          | 0.45           |

**Table S3.** Dependence of cyclic voltammograms on the thickness of the layer of **P2**.

|         | $i_{ox}$ (mA) | $i_{rev}$ (mA) | $\Delta i$ (mA) | $i_{ox}/i_{rev}$ | $E_{ox}$ (V) | $E_{rev}$ (V) | $\Delta E$ (V) |
|---------|---------------|----------------|-----------------|------------------|--------------|---------------|----------------|
| 2000 nm | 7.79          | -1.68          | 9.47            | -4.64            | 1.78         | 0.92          | 0.86           |
| 1500 nm | 7.13          | -1.15          | 8.28            | -6.20            | 1.70         | 1.01          | 0.69           |
| 900 nm  | 4.98          | -1.00          | 5.98            | -4.98            | 1.58         | 1.00          | 0.58           |
| 500 nm  | 4.69          | -0.79          | 5.48            | -5.94            | 1.54         | 1.03          | 0.51           |
| 400 nm  | 3.30          | -0.55          | 3.85            | -6.00            | 1.45         | 0.98          | 0.47           |
| 280 nm  | 2.61          | -0.39          | 3.00            | -6.69            | 1.40         | 1.06          | 0.34           |
| 130 nm  | 1.57          | -0.13          | 1.70            | -12.08           | 1.30         | 0.93          | 0.37           |

**Table S4.** Dependence of cyclic voltammograms on the thickness of the layer of **P3**.

|         | $i_{ox}$ (mA) | $i_{rev}$ (mA) | $\Delta i$ (mA) | $i_{ox}/i_{rev}$ | $E_{ox}$ (V) | $E_{rev}$ (V) | $\Delta E$ (V) |
|---------|---------------|----------------|-----------------|------------------|--------------|---------------|----------------|
| 2500 nm | 7.23          | 0.21           | 7.02            | 34.43            | 1.87         | 1.25          | 0.62           |
| 1000 nm | 7.43          | -0.57          | 8.00            | -13.03           | 1.92         | 1.21          | 0.71           |
| 720 nm  | 3.85          | -0.23          | 4.08            | -16.74           | 1.63         | 1.23          | 0.40           |
| 400 nm  | 1.47          | -0.69          | 2.16            | -2.13            | 1.53         | 1.13          | 0.40           |
| 300 nm  | 1.69          | -0.77          | 2.46            | -2.19            | 1.52         | 1.08          | 0.44           |
| 200 nm  | 1.36          | -0.31          | 1.67            | -4.39            | 1.54         | 1.07          | 0.47           |
| 120 nm  | 0.52          | -0.11          | 0.63            | -4.73            | 1.40         | 1.04          | 0.36           |



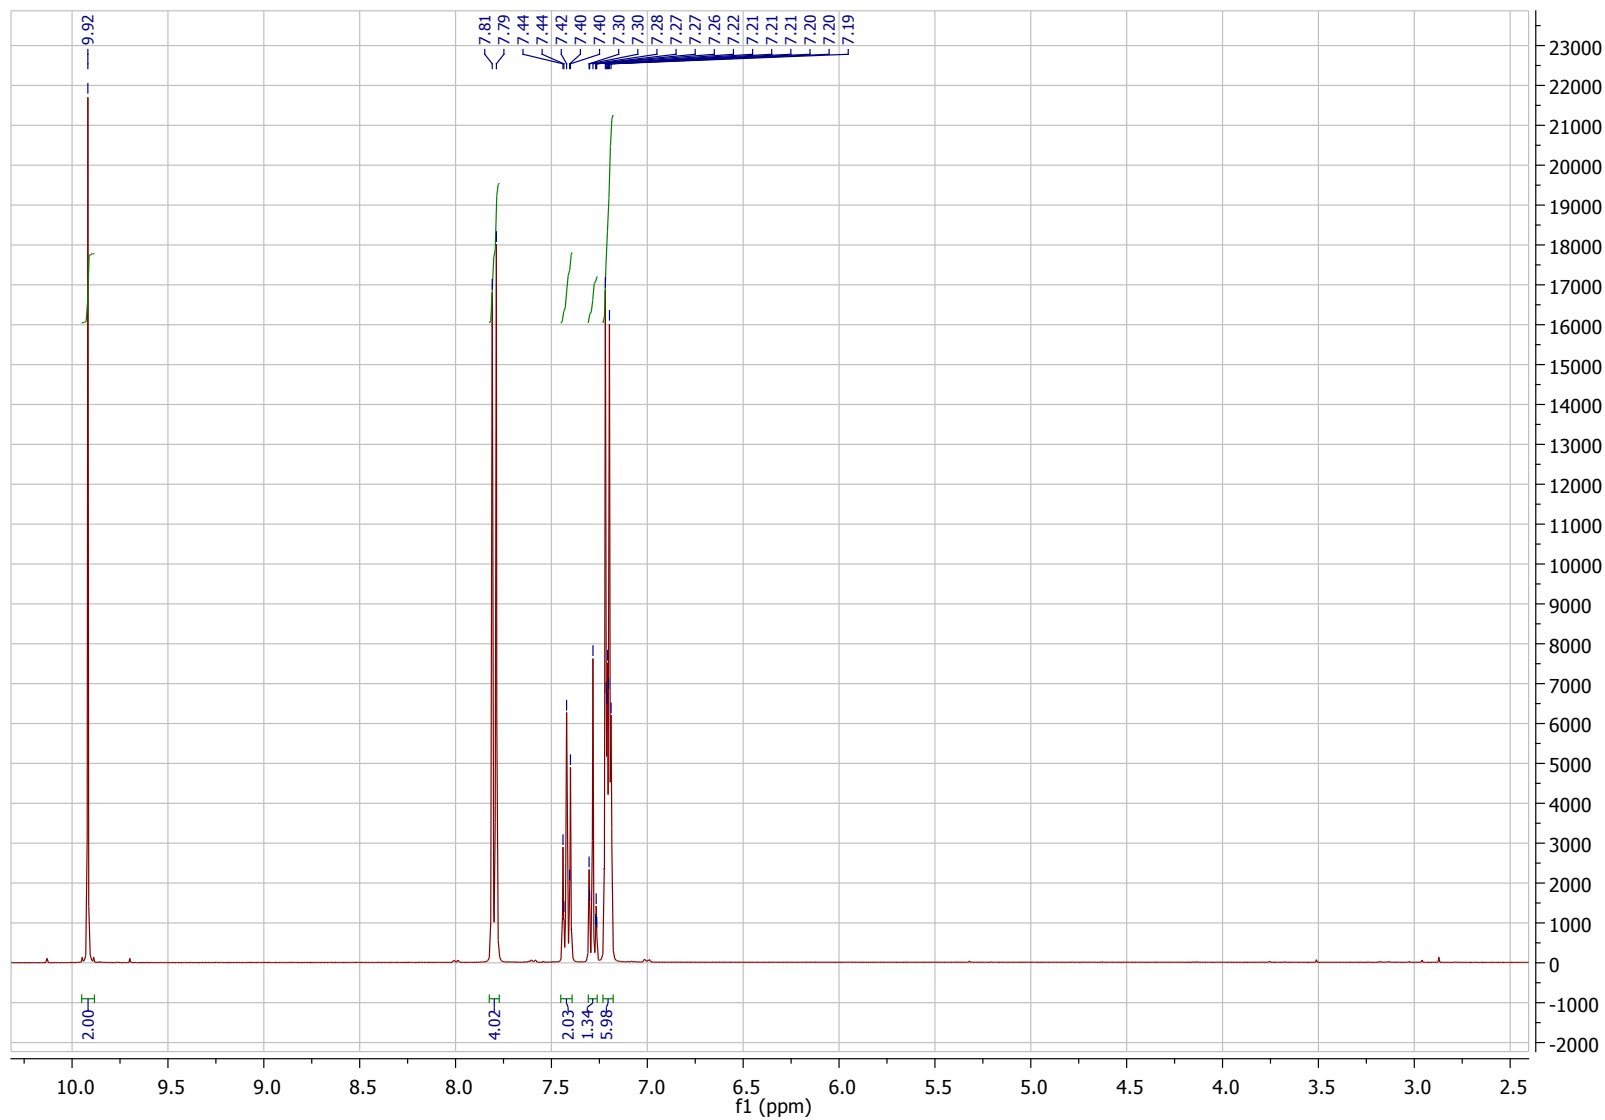

Figure S38. <sup>1</sup>H NMR spectrum of 1.

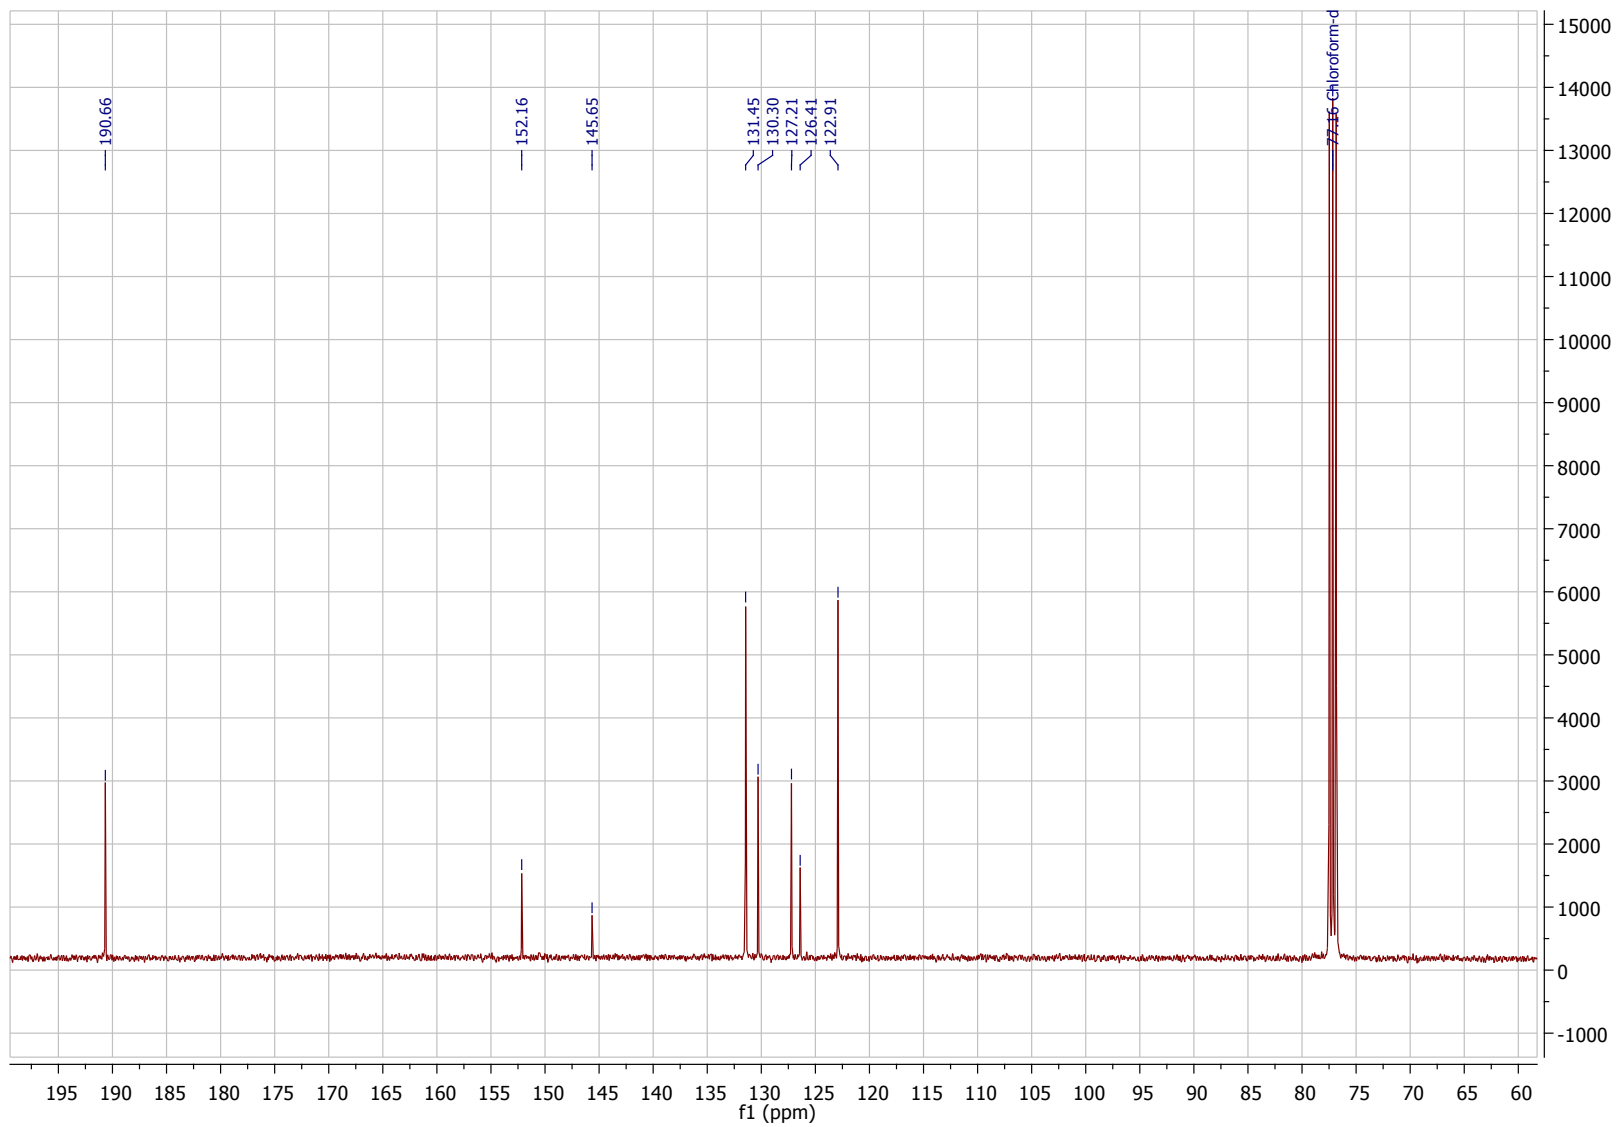

Figure S39.  $^{13}\text{C}$  NMR spectrum of 1.

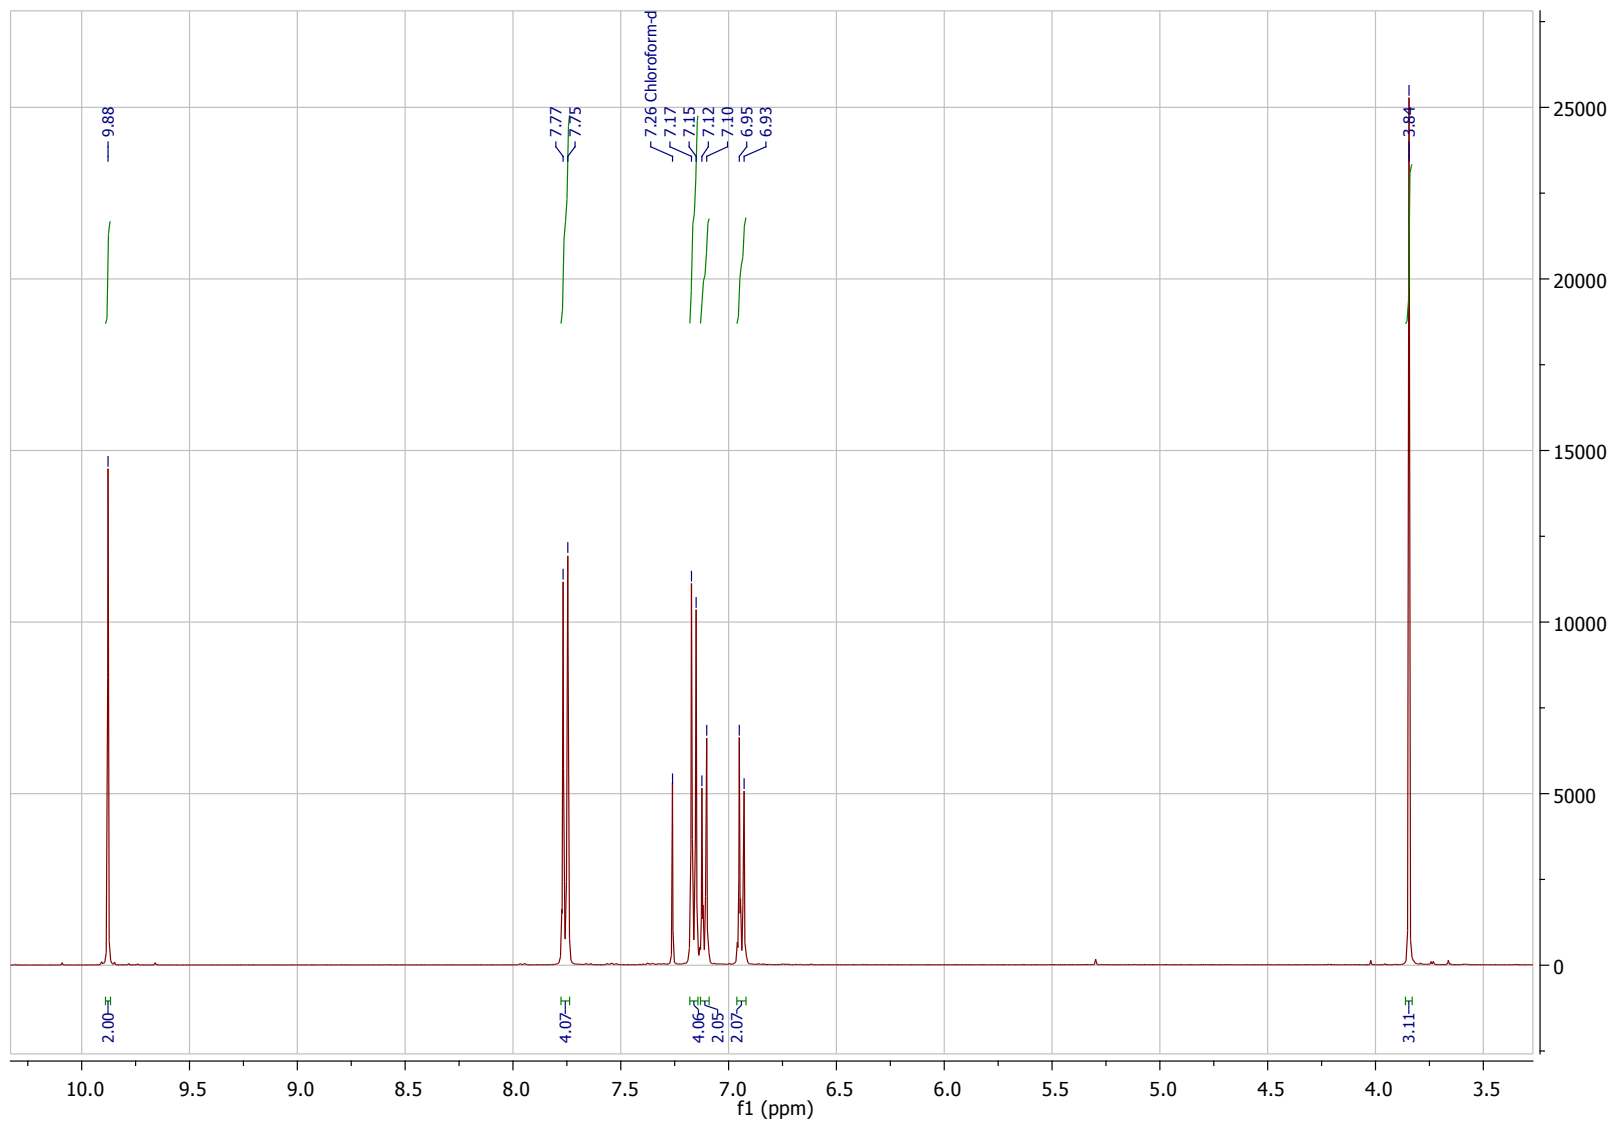

Figure S40  $^1\text{H}$  NMR spectrum of **2**.

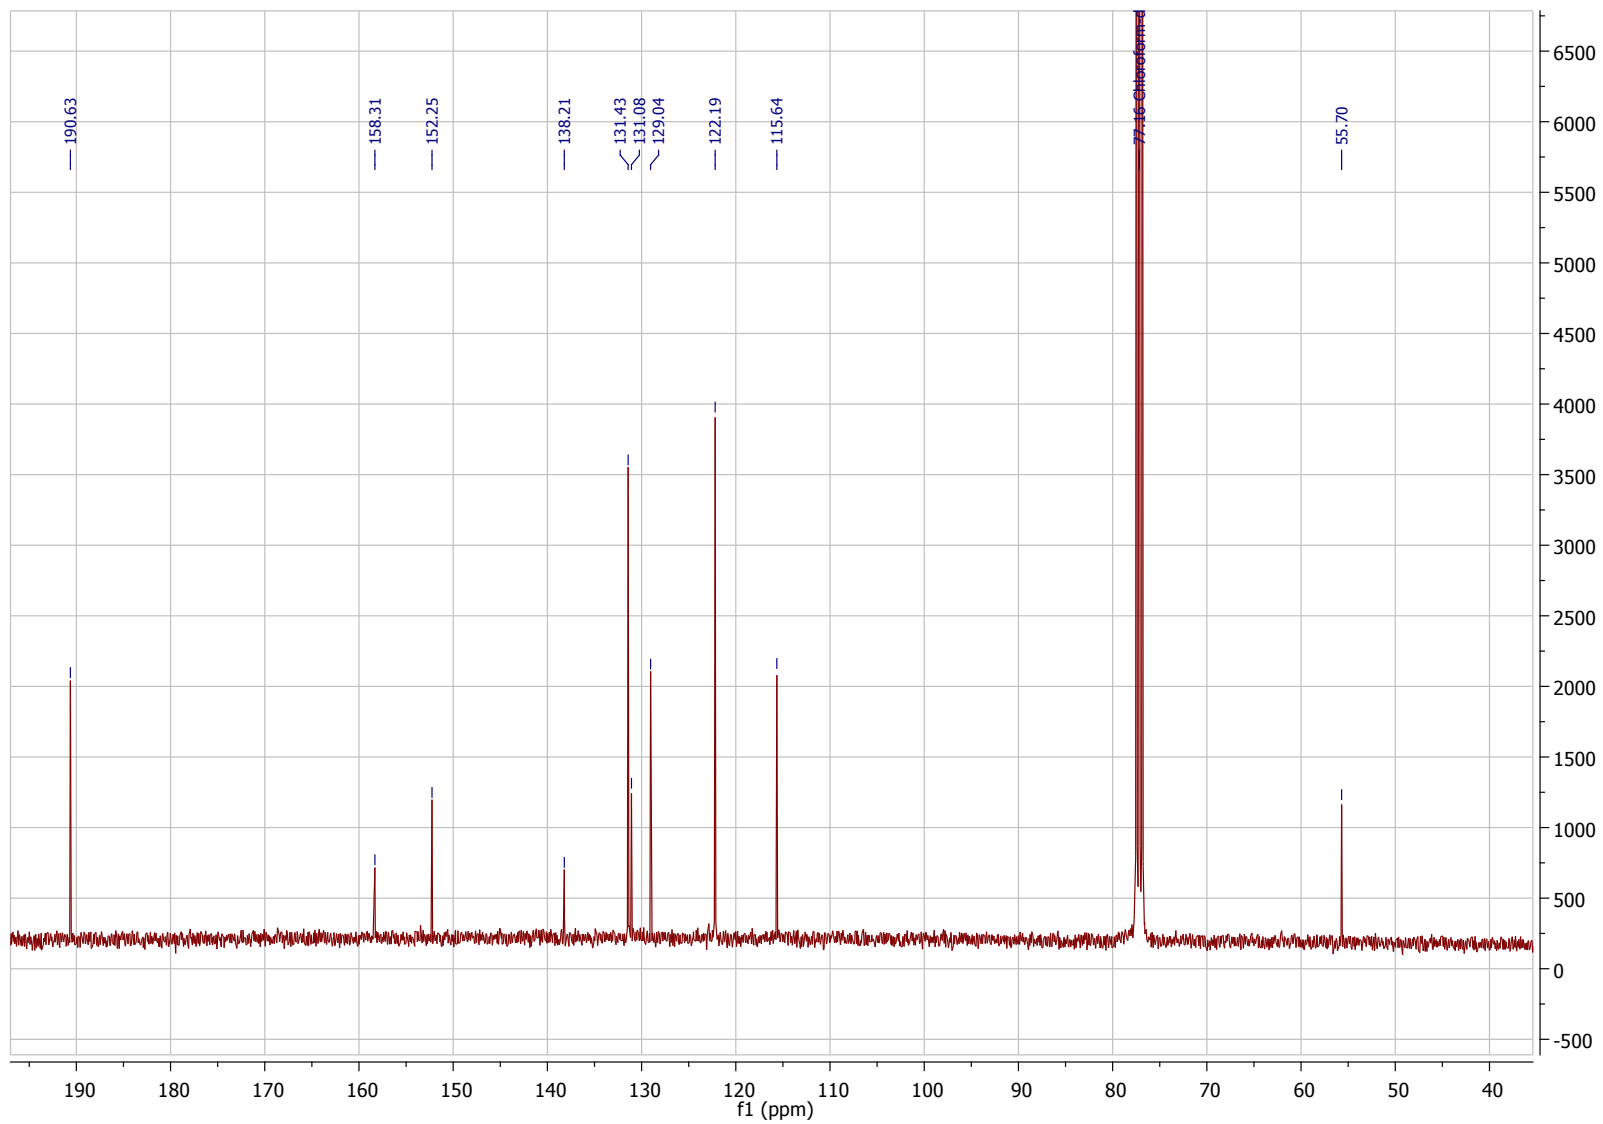

Figure S41.  $^{13}\text{C}$  NMR spectrum of **2**.

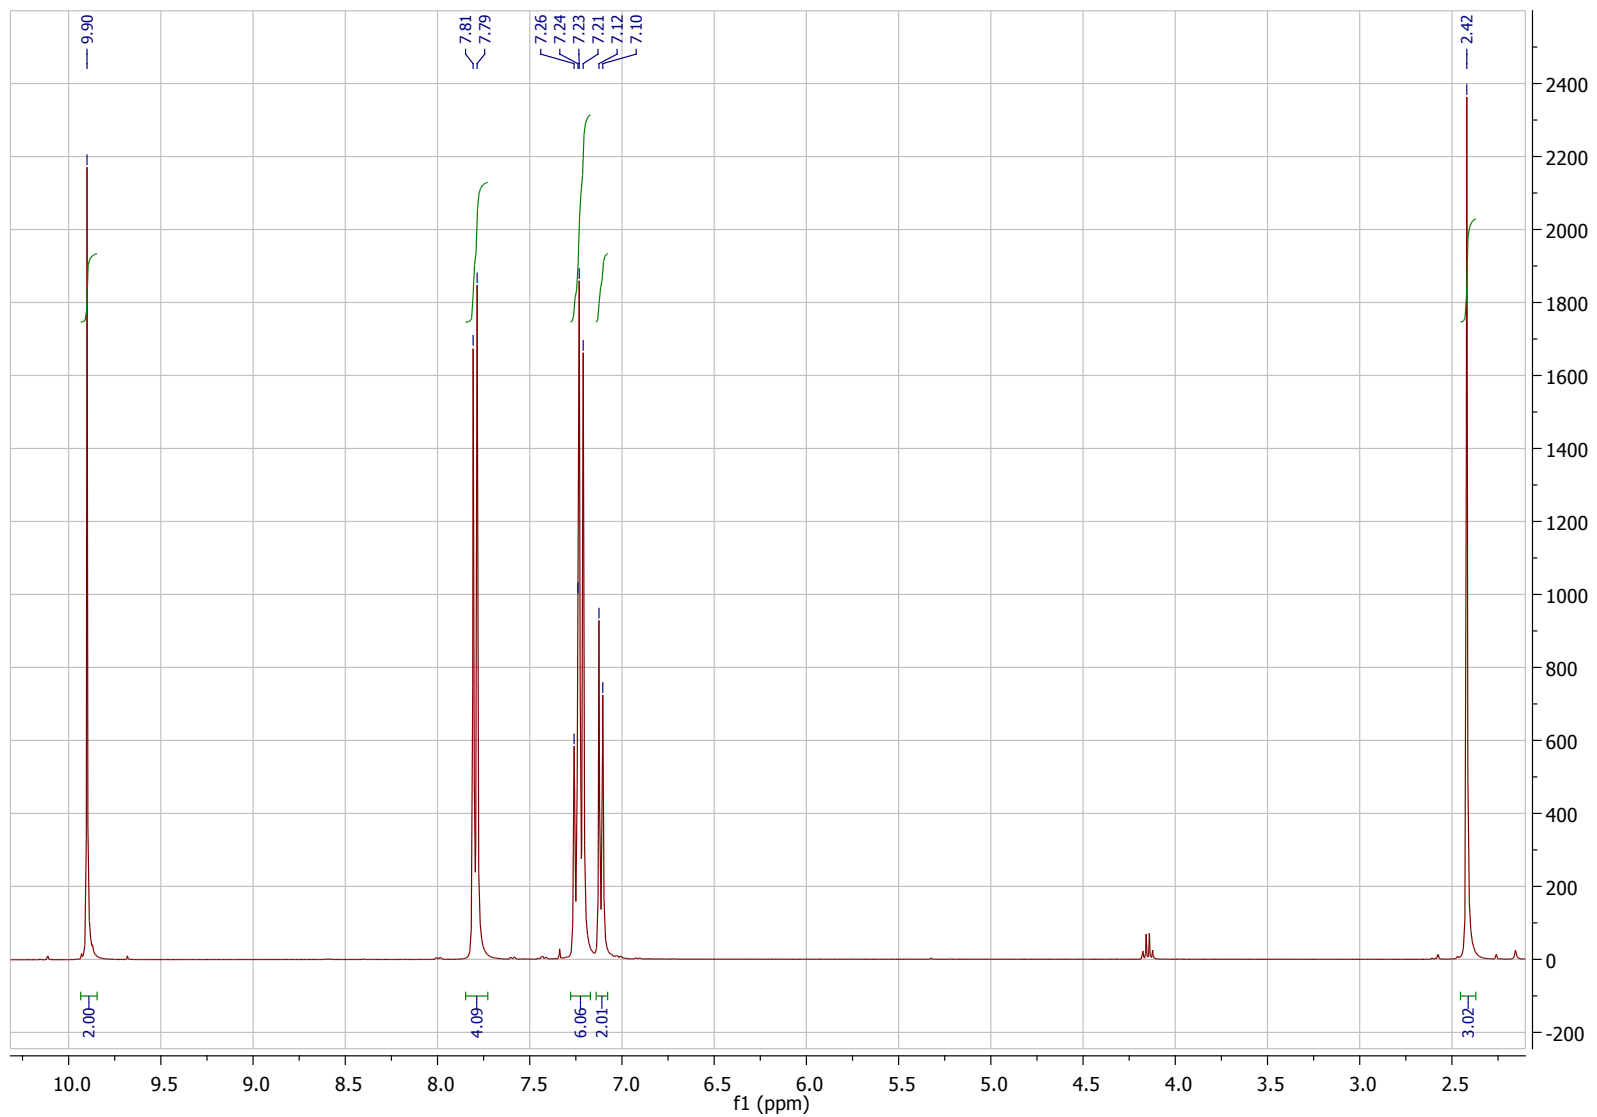

Figure S42. <sup>1</sup>H NMR spectrum of 3.

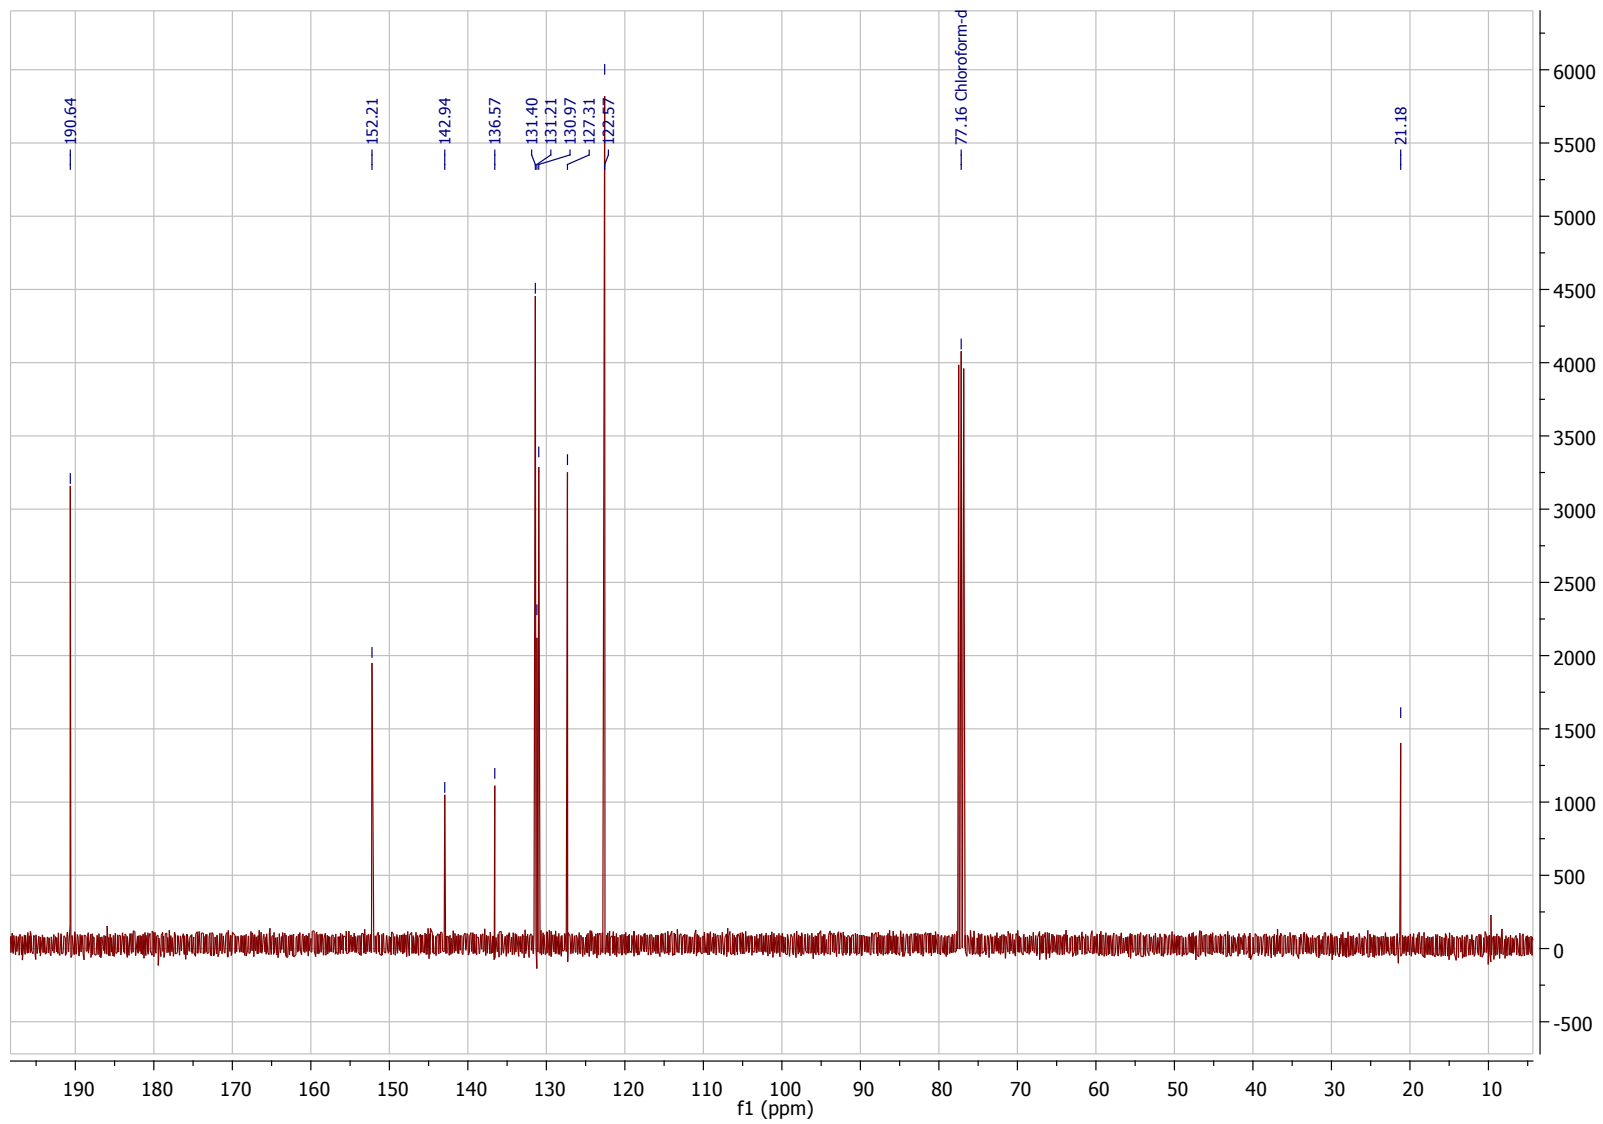

Figure S43  $^{13}\text{C}$  NMR spectrum of 3.
